# Supplementary material for: Antimalarial drug resistance molecular makers of Plasmodium falciparum isolates from Sudan during 2015–2017
Source: PLoS One. 2020 Aug 20;15(8):e0235401. doi: 10.1371/journal.pone.0235401 (PMC7446868; doi:10.1371/journal.pone.0235401)
Supplement: S1 File — (XLSX) [file pone.0235401.s001.xlsx]

## Sheet: amplicon sequencing data
Sample External ID	Location	Species	COIL	McCOIL	Barcode	Kelch	P23:BP	PfCRT	PfDHFR NCSI	PfDHPS SAKAA	PfEXO	PfMDR1	PGB	PfCRT:72	PfCRT:74	PfCRT:75	PfCRT:76	PfCRT:97	PfCRT:220	PfCRT:271	PfCRT:371	PfDHFR:16	PfDHFR:51	PfDHFR:59	PfDHFR:108	PfDHFR:164	PfDHFR:306	PfDHPS:436	PfDHPS:437	PfDHPS:540	PfDHPS:581	PfDHPS:613	PfEXO:415	PfMDR1:86	PfMDR1:184	PfMDR1:1034	PfMDR1:1042	PfMDR1:1226	PfMDR1:1246	PGB:127	PGB:128	PGB:193	PGB:326	PGB:356	PGB:484
H-153	New Halfa	Pf	-	-	XXTXGXXGXAXXTCTXXATXNXXXXXGXXXAGTXXTXATXXTTTTAAGXAGGGAXXXXXNXXXXXXXTGTXXXTAXXXXCATXAXCXXCCXNGXXXNAAXX	-	-	CV[M/I][N/E][K/T]	ICNI	SAKAA	E	NF-	VDDNI-	C	[M/I]	[N/E]	[K/T]	H	S	[Q/E]	[R/I]	A	I	C	N	I	S	S	A	K	A	A	E	N	F	S	N	-	-	V	D	D	N	I	-
H-176	New Halfa	Pf	1	1	AGTCAACGTAAATGTGTAACNGTAATACCTAGCCACGTTGATTTCAAGAAGAGATGXAGACTGGTACCGTACCCAGACTCATAAACATCCTCGCTTCAAGT	WT A626T WT C542Y	-	CVIET	ICNI	SGEAA	E	NFD	VDDSIT	C	I	E	T	H	S	E	I	A	I	C	N	I	S	S	G	E	A	A	E	N	F	S	N	F	D	V	D	D	S	I	T
H-178	New Halfa	Pf	1	1	AGTTAXTGCAAATCTCTATCTTGGGTGGCCTGTCACATCGCACTCAAGXAAGGXTAXGGACAAGCGXTGTAAGTAGAGTTATAGACGTCCCCGCTACAGGC	WT	-	CVMNK	ICNI	AAKAA	E	YFD	VDDNIT	C	M	N	K	H	A	Q	R	A	I	C	N	I	S	A	A	K	A	A	E	Y	F	S	N	F	D	V	D	D	N	I	T
H-179	New Halfa	Pf	1	1	AGTCGXTACXGACGTGCATCAGGGXTGXCTAGCTTCGTTGCTCTTAXGXAGAGANXXXGACTXXCGCCAAACGXAGACCCATXAATATCXXCGCTXCAGGC	E401Q	-	CVIET	ICNI	SGEAA	E	NFD	VDDSIT	C	I	E	T	H	S	E	I	A	I	C	N	I	S	S	G	E	A	A	E	N	F	-	-	F	D	V	D	D	S	I	T
H-180	New Halfa	Pf	1	1	AGTCAXTGTGAATCTCNATCNNTGXTACCTAGTNACATCGCTCTCATGAAAAGATXXAGACTAGNNCTGAACCTAGANCCATXNACNNCCTCGCTXCGGGC	WT	-	CVIET	IRNI	SGEGA	E	NFD	VDDSIT	C	I	E	T	H	S	E	I	A	I	R	N	I	S	S	G	E	G	A	E	N	F	-	-	F	D	V	D	D	S	I	T
H-183	New Halfa	Pf	-	-	XXTXAXXGTXXATGTGTAAAAXGAXXAXXTTXXXACGTCXCTCXTAXAXAAXGAXXXXXAXXXXXAXXGXCXXXAGXCTXXXXXXXXXXXXCGCXXCAAXX	-	-	CVIET	----	-----	E	NFD	VDDSI-	C	I	E	T	H	S	E	I	-	-	-	-	-	-	-	-	-	-	-	E	N	F	-	-	F	D	V	D	D	S	I	-
H-185	New Halfa	Pf	1	1	AGXCAGTGTAGATGTGTATCATGGATGCTTAGTTNTGTCGATCTCAAGAAAAGACAXAGATAAGCAATGAACCCAGGGTCCTCAATGTCCTCGCTACAAGT	WT	-	CVIET	ICNI	SGEAA	E	NFD	VDDSIT	C	I	E	T	H	S	E	I	A	I	C	N	I	S	S	G	E	A	A	E	N	F	S	N	F	D	V	D	D	S	I	T
H-186	New Halfa	Pf	1	1	AGTCAXTGTXGATGCGCAACTGGGATGXCTTGNCACNTCXCTTTCAXAXAAXANTXXXGACAXXCGCCGTACXXAGXNTCATAXCTXTCCXCGCTXCGAXX	-	-	CVIET	ICNI	SGEAA	E	YFD	VDDSIT	C	I	E	T	H	S	E	I	A	I	C	N	I	-	S	G	E	A	A	E	Y	F	S	N	F	D	V	D	D	S	I	T
H-191	New Halfa	Pf	1	1	AGTTNGTGTAGGCNXGCATXAGGAATGXCTTGTCNTATTGCTCTTATGAAAAGGTAXXGATTGATGCCGAXCGTAAAGCCATXAACATCXXCGTTACGGAT	WT	-	CVI[K/E]T	ICNI	[S/A]GE-A	E	NFD	VDDSI-	C	I	[K/E]	T	H	S	E	I	A	I	C	N	I	S	[S/A]	G	E	A	A	E	N	F	S	N	F	D	V	D	D	S	I	-
H-198	New Halfa	Pf	2	2	AGTCAXTGTXNATNXNTAXXNGGNATACXTNGCCANNTXXCNCTCANGNAAAGGNXXAXACTXGXANCGNACNXCGANTCATAAACXXCCTCGNTXCAAXX	-	-	CVIET	ICNI	SGE[A/G]A	E	YFD	VDDSIT	C	I	E	T	H	S	E	I	A	I	C	N	I	S	S	G	E	[A/G]	A	E	Y	F	S	-	F	D	V	D	D	S	I	T
H-228	New Halfa	Pf	1	1	AGTCAXTGTAGATGTGTAACTTGAATAGTTAGTTACAACGCTCTCATGAAAAGGCGXAGACTAACACCATACCCAGAGTCAGAGACGTCCCCGCTTCAAGC	WT	-	CVMNK	ICNI	SGEAA	E	NFD	VDDNIT	C	M	N	K	H	A	Q	R	A	I	C	N	I	S	S	G	E	A	A	E	N	F	S	N	F	D	V	D	D	N	I	T
H-265	New Halfa	Pf	1	1	AXTCAXXGCXAXTGXXTAACXGNGXTAXXXAXNCACXNTXCXCXCAXGXAAAGXTXXXXACXXGXAXCGAAXXXCGXNCXAXAXATXXXXXCGTTXCAAXX	WT	-	CV[M/I][N/E][K/T]	ICNI	-----	E	---	VDDSIT	C	[M/I]	[N/E]	[K/T]	H	[A/S]	E	I	A	-	-	N	I	-	-	-	-	-	-	E	-	-	-	-	-	-	V	D	D	S	I	T
H-266	New Halfa	Pf	2	2	AATCAXTGNAAATNTGTATXTGNANTAGNCAGCNNNGTCNNTCTNANNAANNGXNNXAGACNXGNGCCNTNCNNNGACCNATAANCNNCCXCGCNNCGAGN	WT	-	CVIET	ICNI	SGE[A/G]A	E	NFD	VDDNIT	C	I	E	T	H	S	E	I	A	I	C	N	I	S	S	G	E	[A/G]	A	E	N	F	S	N	F	D	V	D	D	N	I	T
H-267	New Halfa	Pf	1	1	AGTCAGTGTAAATGTCNAACTGGAATACCTAGCCACGTTGCNNTCAAGNAAAGANAXAGACTGGCACCGANCNNCGACTCATAAACGACCTCGTTACANAN	WT	-	CVIET	ICNI	SGEGA	E	YFD	VDDSIT	C	I	E	T	H	S	E	I	A	I	C	N	I	S	S	G	E	G	A	E	Y	F	S	N	F	D	V	D	D	S	I	T
H-268	New Halfa	Pf	-	-	XXTCGXXGXXGATXTCXXTCXTTAAXACTXXGNXACXTXXXTCXXAXGXAAXXXXXXAXXXXXXXGXXGXAXCXAXXXTXXXXXANXXXCXCGXXTCAGXX	-	-	CVIET	----	SGEAA	E	---	VD--IT	C	I	E	T	H	S	E	I	-	-	-	-	-	S	S	G	E	A	A	E	-	-	-	-	-	-	V	D	-	-	I	T
H-270	New Halfa	Pf	1	1	AGTTAGCGTAAACGTGTAACATTAGTACCTAGCCACATCGATTTCAAGAAGAGGTAXGGACAGGTAACATACCCAGAGTCATAACCATTACCATTATAAGT	WT	-	CVIET	ICNI	SGEAA	E	NFD	VDDNIT	C	I	E	T	H	S	E	I	A	I	C	N	I	S	S	G	E	A	A	E	N	F	S	N	F	D	V	D	D	N	I	T
H-271	New Halfa	Pf	2	2	ANNNAXCGTNNANCXGTATCTGTGXTANCTAGTCNCNTNNCNNXNATNAAANGANNXNGACNNGNGCCANNNCTAGNNNCATXAANNNTCXCGCTXCGAGX	-	-	CVMNK	ICNI	S[G/A][K/E]AA	E	[N/Y]FD	VDDNIT	C	M	N	K	H	A	Q	R	A	I	C	N	I	S	S	[G/A]	[K/E]	A	A	E	[N/Y]	F	S	N	F	D	V	D	D	N	I	T
H-272	New Halfa	Pf	-	-	AXTCAXXXCXAXCGXGTAAXTGGXXXNXXCTXXCAXXTTXXTTTXXXAXAXAGXXXXXGACXXXXAXCAXAXXXAGXXTTXXXXXCXXCXXXGCXXCAAXX	-	-	CVMNK	ICNI	-----	E	-FD	VDDNIT	C	M	N	K	H	A	Q	R	-	-	-	N	I	-	-	-	-	-	-	E	-	F	-	-	F	D	V	D	D	N	I	T
H-273	New Halfa	Pf	1	1	AATTAGTGTAAGTGTGTATAAGGAATAGCTAATTACATCGAACATATGAAAAGGCAXGCACTAGCAACATACGTAAGGTCATAACTATCCTCGTTTCAAAT	WT	WT	CVMNK	ICNI	SGEGA	E	NFD	VDDNIT	C	M	N	K	H	A	Q	R	A	I	C	N	I	S	S	G	E	G	A	E	N	F	S	N	F	D	V	D	D	N	I	T
H-284	New Halfa	Pf	1	1	AGTTAXTGTAAACGTCTATAXTGGGTAGCCTGCTACATCCCACTTAAGAAAAGGCAXGGACAAGCGCTGTACNTAGACTTATAGCCATCCTCGCTNCGAGT	WT	-	CVMNK	ICNI	SGEAA	E	YFD	VDDNIT	C	M	N	K	H	A	Q	R	A	I	C	N	I	S	S	G	E	A	A	E	Y	F	S	N	F	D	V	D	D	N	I	T
H-288	New Halfa	Pf	1	1	AATCAXTGCAAANCTGTATATTTGATAGNCAGCCTCAACXCNCTTATANAAGGGTXXGGACAAGCACTGTAACTAGAGTXATAACTATCCXCGCTACAAGC	WT	-	CVMNK	IRNI	SGEAA	E	YFD	VDDNIT	C	M	N	K	H	A	Q	R	A	I	R	N	I	S	S	G	E	A	A	E	Y	F	S	N	F	D	V	D	D	N	I	T
H-289	New Halfa	Pf	1	1	AXTCAXXGCGAATGXCTXNCXGXXXXAXXTAXXCACGTTXCACTCXXGXAAXGXTXXAXACXXGXAXCGAAXCXCGXCXCXTXAATXACXXCGTXXCAAXX	-	-	CVIET	--NI	-----	E	-FD	--DSIT	C	I	E	T	H	S	E	I	-	-	-	N	I	-	-	-	-	-	-	E	-	F	S	N	F	D	-	-	D	S	I	T
H-290	New Halfa	Pf	1	1	AGTCAXTGCXAATGTCTAACNGGGNTACCTAGCCACGTTGCACTCATGAAAAGATAXACACTGGCACCGAACCCCGACCCATAAATGACCTCGTTACAAAT	WT	-	CVIET	ICNI	SGEGA	E	YFD	VDDSIT	C	I	E	T	H	S	E	I	A	I	C	N	I	S	S	G	E	G	A	E	Y	F	S	N	F	D	V	D	D	S	I	T
H-293	New Halfa	Pf	2	2	AXTCAXNGTGNATGTGCANCATGGATGXXTAGNTATGTCXCTNTNAXNXAAXGANXXAGANNXNCAXNGTNCNXAGXNTCCXAAATGTCCXCGCTACAAXX	-	-	CVIET	ICNI	SGEAA	E	N[Y/F]D	VDDSIT	C	I	E	T	H	S	E	I	A	I	C	N	I	S	S	G	E	A	A	E	N	[Y/F]	S	N	F	D	V	D	D	S	I	T
H-294	New Halfa	Pf	1	1	AGTCAXCGTGGACGTCTATCTGGGATGCCTTGCCTCATTGATTTTAAGAAAAAATAXAGACAGGCACCAACCCTAGAGTCATAAATATCCCCGCTACAAAC	WT	-	CVIET	ICNI	SGEAA	E	YFD	VDDSIT	C	I	E	T	H	S	E	I	A	I	C	N	I	S	S	G	E	A	A	E	Y	F	S	N	F	D	V	D	D	S	I	T
H-295	New Halfa	Pf	1	1	AGTCAXTGCAGATGTGTATCTGTGACGCCTNGTCTCXTCXCTTTTAAGAAAXGAXXXXGACTGGTAXTGTCACTAGGGTCATAAATNTCCCCGCTTCAGGT	WT G625R	-	CVIET	ICNI	SGE--	E	HF-	VDDSIT	C	I	E	T	H	S	E	I	A	I	C	N	I	S	S	G	E	A	A	E	H	F	S	N	-	-	V	D	D	S	I	T
H-296	New Halfa	Pf	1	1	AGTCAXTGTAXATGCCTAACATGXXTNCCTTGTCACGTCGCTCTCATGAAAAGACAXXGACTGXTGCTGXACCCAXACCCATXGXNATCCXCGCTTCAGGC	-	-	CV[M/I][N/E][K/T]	IRNI	SGE--	E	NFD	VDDSIT	C	[M/I]	[N/E]	[K/T]	H	S	E	I	A	I	R	N	I	S	S	G	E	A	A	E	N	F	S	N	F	D	V	D	D	S	I	T
K60	Kassala	Pf	1	1	AGTCNGTACAAATCTGTANCAGGAATGXCTTGTCACGTCCCTCTTATAXAAAGATAXXGACAGGTACCGACCGTAGACTTATAGATGACXXCGCTACAAAX	WT	-	CVIET	ICNI	SG[K/E]AA	E	YYD	VDDSIT	C	I	E	T	H	S	E	I	A	I	C	N	I	S	S	G	[K/E]	A	A	E	Y	Y	S	N	F	D	V	D	D	S	I	T
K78	Kassala	Pf	1	1	AGTCAGTGCAAACCCCCATCAGNAATGGCTTGNCTCGATXATTTTAXACAAAGATAXAGACXGGNACCATCCGXAGGNTTATXAATATCCXCGCXXCAGGC	-	-	CVIET	ICNI	SAKAA	E	---	VDDNIT	C	I	E	T	H	S	E	I	A	I	C	N	I	S	S	A	K	A	A	E	-	-	S	N	-	-	V	D	D	N	I	T
GH-2015-1	Gezira	Pf	1	1	AGTCAGCGTAGACCCGTGTCAGTAATGGCTAGTTATATTGATTTTAAGAAAAAGTGXGGACAAGCGACATACCTAGGCTCATAAACATCACCGTTTTAAGC	WT	-	CVMNK	ICNI	SGKAA	E	NFD	VDDNIT	C	M	N	K	H	A	Q	R	A	I	C	N	I	S	S	G	K	A	A	E	N	F	S	N	F	D	V	D	D	N	I	T
GH-2015-2	Gezira	Pf	2	2	NATCNNNGCNNANNTGNANNAGTAATANCCNNNTNCNATGCAXNNNNANNANGNNNXGGACNNGTNNTXNANCCAGNGTTAGANACNANNTNGNTNNAXAC	WT	-	CVMNK	ICNI	[S/A][G/A]KAA	E	NFD	VDDNIT	C	M	N	K	H	A	Q	R	A	I	C	N	I	S	[S/A]	[G/A]	K	A	A	E	N	F	S	N	F	D	V	D	D	N	I	T
GH-2015-3	Gezira	Pf	1	1	AGTCNGTGCGAATGTCTANCTGGGXTAXCTAGCCACGTTGCACTXAXGAAAAGATAXXCACTGGCACCGAXCCCCGANCCATXAATGACCXCGTTACAAAT	WT	-	CVIET	ICNI	SGEGA	E	YFD	VDDSI-	C	I	E	T	H	S	E	I	A	I	C	N	I	S	S	G	E	G	A	E	Y	F	S	N	F	D	V	D	D	S	I	-
GH-2015-4	Gezira	Pf	2	2	ANTCNATXTAGXTGXGXXNCAGGGATGXCCTGTTACATNCNACATANAXAAAGANAXXGACTAGCACNGNXCCTAGNGTTAXANACATCXXCGNTACANNX	WT V494I	WT	CVIE-	I[C/R]NI	SAKAA	E	NYD	VDD-IT	C	I	E	T	H	[A/S]	E	I	A	I	[C/R]	N	I	S	S	A	K	A	A	E	N	Y	S	N	F	D	V	D	D	-	I	T
GH-2015-5	Gezira	Pf	2	2	AGTCNGTGTAANTNTCTNACAGTNATNNCNNNTNATNNCGANTTTAAACAANGATGXNGACTGNCGCTNNACCNAGNGCCATAGANNNNNTCGCTNNGNNT	WT	WT	CVMNK	ICNI	SGEGA	E	NYD	VDDNIT	C	M	N	K	H	A	Q	R	A	I	C	N	I	S	S	G	E	G	A	E	N	Y	S	N	F	D	V	D	D	N	I	T
GH-2015-6	Gezira	Pf	1	1	AGTCGGTGTAANTCTCTAACAGTGATGCCNAATCATGACGATTTTAAACAAGGATGXAGACTGGCGCTANACCCAGAGCCATAGACGACCTCGCTNTGGGT	WT	-	CVMNK	ICNI	SGEGA	E	NYD	VDDNIT	C	M	N	K	H	A	Q	R	A	I	C	N	I	S	S	G	E	G	A	E	N	Y	S	N	F	D	V	D	D	N	I	T
GH-2015-7	Gezira	Pf	1	1	AGTCAGTGCAAXCCTCTAACTTTAATAGCCAGCTTCATCGCACTTAAGAAAAGGCAXGGCCTAGCACCAAXCCCAGACTXATAGACATCCTCGCTACAAAC	WT	-	CVMNK	ICNI	SGEGA	E	YFD	VDDNIT	C	M	N	K	H	A	Q	R	A	I	C	N	I	S	S	G	E	G	A	E	Y	F	S	N	F	D	V	D	D	N	I	T
GH-2015-8	Gezira	Pf	2	2	NNTCNNNGNANANGTNNATCNNNAANXGTNAGNNNCNNNGCNNTCNNNANNNGNTAXNGACAAGNNNTNTANCCAGNGNCAGXANNGATCNNGNTNNNGAC	WT	-	CV[M/I][N/E][K/T]	I[C/R]NI	S[G/A][K/E][A/G]A	E	NFD	VDD[N/S]IT	C	[M/I]	[N/E]	[K/T]	H	[A/S]	[Q/E]	[R/I]	A	I	[C/R]	N	I	S	S	[G/A]	[K/E]	[A/G]	A	E	N	F	S	N	F	D	V	D	D	[N/S]	I	T
GH-2015-9	Gezira	Pf	1	1	AGTCNGCGTAGATGTGCATCTXTAATACCTNGTTATATCGCTCTNAAGAAAAGACGXAGACTAGCGCCGTCCCCAGNGTCATAAACAACCTCGTTTCAAGC	WT	-	CVIET	ICNI	SGEAA	E	YFD	VDDSIT	C	I	E	T	H	S	E	I	A	I	C	N	I	S	S	G	E	A	A	E	Y	F	S	N	F	D	V	D	D	S	I	T
GH-2015-10	Gezira	Pf	1	1	GGTCAGTGTAAACCTGTGACTTTAACGCCTTATTATGACCCACTCAAGAAAAAATGXAGACTAGTGATATCCCCAGACTCAGAACTATCATCGCTACAAGT	WT	-	CVIET	ICNI	SAKAA	E	NFD	VDDNIT	C	I	E	T	H	S	E	I	A	I	C	N	I	S	S	A	K	A	A	E	N	F	S	N	F	D	V	D	D	N	I	T
GH-2015-11	Gezira	Pf	1	1	AGTTAGTGCAAATGTGTATCATGAACGXCCTGCCACATTGCACTTAAAAAAAGATGXAGACTAATACTAAACCTAGGCTCATXAACATTATCGCTACAAGT	WT	-	CVIET	IRNI	SGEAA	E	NFD	VDDNTT	C	I	E	T	H	S	E	I	A	I	R	N	I	S	S	G	E	A	A	E	N	F	S	N	F	D	V	D	D	N	T	T
GH-2015-13	Gezira	Pf	-	-	AXTCANXXNXNXTNXXXXNXTXGXXXNXXTNGXCAXNXNXXNNTXXXNXAXXNNTXXXGXCXXGXNXXNTXXCXAGXNXCXXXXNTXNXXXXGXXXCNNXX	-	-	-----	--NI	-----	E	-FD	VDD-I-	-	-	-	-	H	-	-	[R/I]	-	-	-	N	I	-	-	-	-	-	-	E	-	F	S	N	F	D	V	D	D	-	I	-
GH-2015-14	Gezira	Pf	1	1	AANCNXTGCAAXNXTGXXACAGGXATGXCTAGNCTCGXCXCTXTXXXGXAGNGGTAXXGACTGGCACXAXXCXXAGXGCCATXAATGAXXXCXCNTCAAGX	-	-	CVIET	I-NI	-----	E	YFD	VDD-IT	C	I	E	T	H	-	-	I	A	I	C	N	I	S	-	-	-	-	-	E	Y	F	S	N	F	D	V	D	D	-	I	T
GH-2015-15	Gezira	Pf	2	2	AXXCNGXXTAAXTXXCXXNCAXTGAXNXXNNNXNAXNXCXXNTTXXXAXANXGNTGXXGXCXGNXGXXNNXXCXANXGCCXXXXANNNNXXXGXXNNGNXX	-	-	-----	ICNI	SGEGA	E	-YD	--D-IT	-	-	-	-	H	-	Q	-	A	I	C	N	I	-	S	G	E	G	A	E	-	Y	S	N	F	D	-	-	D	-	I	T
GH-2015-20	Gezira	Pf	1	1	AGTCAGTGCGAACCTGTGTCAGTGGTACCTTGCCACGTTGCTCTTATGCAAAGATAXAGACTGGTACTGTACGTAGAGTTAGAAATGACCCCGCTACAGAT	WT	-	CVIET	ICNI	SGEGA	E	YFD	VDDSIT	C	I	E	T	H	S	E	I	A	I	C	N	I	S	S	G	E	G	A	E	Y	F	S	N	F	D	V	D	D	S	I	T
GH-2015-21	Gezira	Pf	2	2	ANTCAGNGNANXCCTCTANCNNNAATGGCNNGTTANNTCGNTCTNAAXAAAAGXCNXNGATTAGNAACNXNACXAGNXTTANANNCNTCACNXCTNCANGN	WT	-	CV[M/I][N/E][K/T]	ICNI	SG[K/E]AA	E	NFD	VDDNIT	C	[M/I]	[N/E]	[K/T]	H	[A/S]	[Q/E]	I	A	I	C	N	I	S	S	G	[K/E]	A	A	E	N	F	S	N	F	D	V	D	D	N	I	T
GH-2015-22	Gezira	Pf	1	1	AGTCAGTGTAAATGTCCAACAGGGATACCTTGCCACGTCGCACTCATGAAAAGATAXACACTAGCACTGAACCCAGACTCATAAACGACCTCGCTACAGAT	WT	WT	CVIET	ICNI	SGEGA	E	YFD	VDDSIT	C	I	E	T	H	S	E	I	A	I	C	N	I	S	S	G	E	G	A	E	Y	F	S	N	F	D	V	D	D	S	I	T
GH-2015-23	Gezira	Pf	1	1	AGTTAXXXCXAGCGXGTAACAGGAATGXCTTGCTAXATCXCTCTTXXGXAAAGGCGXXGACTXGXGXCGTXXCXAGAGTTXXAGCCGACCXCGCTACGAGX	-	-	CVIET	--NI	S--GA	E	YYD	VDD-IT	C	I	E	T	H	S	E	I	A	-	-	N	I	S	S	-	-	G	A	E	Y	Y	S	N	F	D	V	D	D	-	I	T
GH-2015-24	Gezira	Pf	1	1	AGTCAGTGCAAXCGXGCATCTTGAATGXCTTACCACGATGATTTTAXGXAAAGATAXXGACTAGTAACGAXXCCAGGGTCATAAATAACXXCGTTATAAAC	WT	-	CVIET	ICNI	SAKAA	E	NFD	VDDNIT	C	I	E	T	H	S	E	I	A	I	C	N	I	S	S	A	K	A	A	E	N	F	S	N	F	D	V	D	D	N	I	T
GH-2015-36	Gezira	Pf	1	1	AGTCNNTGTAAATGTCTAACAGTGATACCCTGTTATGTCGNTTTCAAACAAAGATGXNGACTGACGCTAANCCTAGAGCCATAXACNACCXCGCTTCGAGN	WT	WT	CVIET	ICNI	SGEGA	E	NYD	VDD[N/S]IT	C	I	E	T	H	S	E	I	A	I	C	N	I	S	S	G	E	G	A	E	N	Y	S	N	F	D	V	D	D	[N/S]	I	T
GH-2015-37	Gezira	Pf	1	1	AGTTAGTGCGAACGTGCATCTTGGATACCTAGCTTCATTGAACTTAAGAAAAGACAXAGACTAGCACCATCCCTAGGGCTATAACCATCCXCGCTTCAAGT	WT	-	CVIET	ICNI	SGEAA	E	YFD	VDDSIT	C	I	E	T	H	S	E	I	A	I	C	N	I	S	S	G	E	A	A	E	Y	F	S	N	F	D	V	D	D	S	I	T
GH-2015-40	Gezira	Pf	1	1	AGTTAXCGTAXACGXGTAAXATTXXTGXTTAXTCTXATCGCXNTCAAGAAAAGGTGXAGATTGXCGATAXACCCCGGCCCATXAXCATXCXCXCATCAXGT	WT	-	CVIE[T/I]	ICNI	SGEAA	E	NFD	VD-NI-	C	I	E	[T/I]	H	S	-	I	A	I	C	N	I	S	S	G	E	-	-	E	N	F	-	-	F	D	V	D	-	N	I	-
GH-2015-44	Gezira	Pf	1	1	AGTTAGCGTAGACGTGTAACATTGGTGGTTAGTCTCATCGCTCTCAAGAAAAGGTGXAGATTGGCGATATACCCCGGCCCATAACCATCCTCGCATCAAGT	WT	-	CVIET	ICNI	SGEAA	E	NFD	VDDNIT	C	I	E	T	H	S	E	I	A	I	C	N	I	S	S	G	E	A	A	E	N	F	S	N	F	D	V	D	D	N	I	T
O- 2017- S1	North Kordofan	Pf	1	1	XGTCNXCGXAXXCNXCCANXXGGAXTNXCTAXCCAXATCGCXCTTXXAAXANGATXXXGACTGXXGCCXXNCGTAGXGTXXTXACTGTXCCCGCTTCAXAC	-	-	CVIET	ICNI	SAKAA	E	YYD	VDDN[I/T]T	C	I	E	T	-	S	-	I	A	I	C	N	I	S	S	A	K	A	A	E	Y	Y	-	N	F	D	V	D	D	N	[I/T]	T
O- 2017- S22	North Kordofan	Pf	1	1	AXTCAXCGNXAXCCXNTNAXXGTGXXAXXXTXCXACXTXXXTXXCATXXAAXGXXXXXGXXTXGXAXNATXCXXAGGCTXAXXAACXXCXTCGXTXXXAGX	F442F	-	CVIET	----	-----	E	---	VDDSIT	C	I	E	T	H	S	E	I	-	-	-	-	-	-	-	-	-	-	-	E	-	-	-	-	-	-	V	D	D	S	I	T
O- 2017- S23	North Kordofan	Pf	1	1	XGTCAGTGCAXACGTGCATCXGNGXTGGCTAXCTXCGTTXATCXCAXAAAAAGACXXXGXXTGXXAAXGTACXTAGAGTCATCAATXXTCXCACXXTAAXX	WT	-	CVIET	ICNI	SAKAA	E	NFD	VDDNIT	C	I	E	T	H	S	E	I	A	I	C	N	I	S	S	A	K	A	A	E	N	F	-	-	F	D	V	D	D	N	I	T
O- 2017- S26	North Kordofan	Pf	1	1	XGTNGXTGCAGATGNCTANCXGTGATGGCTAXCCACGTNXCTCTCAAGAANAGATXXAGACTAGXAACGTCCXTAGXCTCAGAAACXXCCXCGCTTCAAXX	WT	-	CVIET	ICNI	SGEAA	E	NFD	VDDNTT	C	I	E	T	H	S	E	I	A	I	C	N	I	S	S	G	E	A	A	E	N	F	-	-	F	D	V	D	D	N	T	T
O- 2017- S28	North Kordofan	Pf	2	1	XGTXNXNGNAXANGNNCAAXXGGGANACCNNXCXXCXTTXCXCXCANGAAAAGAXXXXXNXTGGXXNCNXNCXNAGNNTCANXAXCAXCCXCGCTXXANXX	WT	-	CVIET	ICNI	SGEAA	E	YF-	VDDSI-	C	I	E	T	H	S	E	I	A	I	C	N	I	S	S	G	E	A	A	E	Y	F	-	-	-	-	V	D	D	S	I	-
O- 2017- S32	North Kordofan	Pf	1	1	XXTCAXXGCAXACCXXCAACAGNGXXACXTTXCXXCXTTXCXCTCXXNXAAXGXXXXXXAXTXXXAXCAXACXXAGAXTXXXAAXCXXCXXCGTXXCAGXX	-	-	CVIET	----	-----	E	---	VDD[N/S]I-	C	I	E	T	H	S	E	I	-	-	-	-	-	-	-	-	-	-	-	E	-	-	-	-	-	-	V	D	D	[N/S]	I	-
O- 2017- S34	North Kordofan	-	1	1	XGTCAXTGXAXGTGTGTATXXTGAXTGXCNXXTXXCXTTXCTTTTAXAAAAXGATXXAXAXTXGXGCCGTXXXXAGAXTTATAAXNGACCCCNTTNCANXX	E433D	-	CV[M/I]-[K/T]	ICNI	SGEGA	E	--D	VDDN-T	C	[M/I]	[N/E]	[K/T]	H	A	[Q/E]	R	A	I	C	N	I	S	S	G	E	G	A	E	-	-	-	N	F	D	V	D	D	N	-	T
O- 2017- S36	North Kordofan	Pf	2	2	AGTCNXTGCNNATGNGTANCXGNGNNGXCNTXCCNCGTNCCTCTCANGAANAGATXXXNNCTNGCANNNNXCCNAGNNTCXNAAXCATCCXCGCTTCANNC	WT	-	CV[M/I][N/E]T	ICNI	SGE[A/G]A	E	YFD	VDD[N/S][I/T]T	C	[M/I]	[N/E]	T	H	S	E	I	A	I	C	N	I	S	S	G	E	[A/G]	A	E	Y	F	S	N	F	D	V	D	D	[N/S]	[I/T]	T
O- 2017- S38	North Kordofan	Pf	1	1	XGTCAXTGTAGATGXGCANCXNGGNCGCCTTXXXNCNTNXCTCTNXXAAAAAGATXXXNACTXGXNXCNTNCGCAGAGTCATAACCXXCCTCGNTNCGNXX	WT W565STOP	-	CVIET	ICNI	SGEAA	E	[N/Y]F-	VDDSIT	C	I	E	T	H	S	E	I	A	I	C	N	I	S	S	G	E	A	A	E	[N/Y]	F	-	-	-	-	V	D	D	S	I	T
O- 2017- S39	North Kordofan	-	1	1	XGTCAXXGXXXACGTGCATNXGXXNXGNXXXXCXACATNXNXTXTAXNXAAXGAXXXAXAXTGXXXNTGXNCXXAGAXTNATXAAXXXCCXCGNTTXXAXX	-	-	CV[M/I][N/E][K/T]	IC--	-----	E	[N/Y]--	VDD[N/S]I-	C	[M/I]	[N/E]	[K/T]	H	[A/S]	[Q/E]	[R/I]	A	I	C	-	-	S	-	-	-	-	-	E	[N/Y]	-	-	-	-	-	V	D	D	[N/S]	I	-
O- 2017- S40	North Kordofan	Pf	1	1	XATXAXXGTXGXXCTXTANCXGXAAXGXCXXGXXACATCXXXCTTXXGNAAXNXXXXXXXXXXXXGCCAAXXXXCGGXTTAGXXACXXXCTXAXTACANXX	-	-	-----	ICNI	AAKAA	E	---	VDDNIT	-	-	-	-	H	S	E	I	A	I	C	N	I	-	A	A	K	A	A	E	-	-	-	-	-	-	V	D	D	N	I	T
O- 2017- S42	North Kordofan	Pf	1	1	XGTCAATGTAGATGCGCAACTGGGATGCCTTGCCACATCXCTTTCAXAAAAAAATAXXGACAAGCGCCGTACCXAGAGTCATAACTXXCCTCGCTXCGAXC	-	WT	CVIET	ICNI	SGEAA	E	-FD	VDDSIT	C	I	E	T	H	S	E	I	A	I	C	N	I	S	S	G	E	A	A	E	-	F	S	N	F	D	V	D	D	S	I	T
O- 2017- S43	North Kordofan	Pf	1	1	XGTCAXTGCGAACGTGNAACXGGXACAXCTTXCXNCXTXXCXCTCATGXNAAGAXAXXNCCTAGXACTAXXCXXAGAGTCATAXCCXXCCXCGCTXCAGXX	WT	-	CVIET	----	SGEGA	E	---	VDDSIT	C	I	E	T	H	S	E	I	-	-	-	-	-	S	S	G	E	G	A	E	-	-	-	-	-	-	V	D	D	S	I	T
O- 2017- S46	North Kordofan	Pf	1	1	XGTCGXXGTXXATGCCTAAXXGTGXXAXCXXXCXNCXTCXXXCTCAXGXAAAGAXXXXGAXXXXXXXCGXCCXXAGGXTCAXXAAXXXXCTCGCTNCAAXX	-	-	CVIET	ICNI	SGEAA	E	---	VDDSIT	C	I	E	T	H	S	E	I	A	I	C	N	I	S	S	G	E	A	A	E	-	-	-	-	-	-	V	D	D	S	I	T
O- 2017- S49	North Kordofan	Pf	1	1	XXTCAGXGTXAACCTCXXTXXGGGXXGXXTNXTTACXTTXXTNXTAXGCAAXGXXXXXGXXXXXXGCCGTXNGXAGXXTXXXXXACXXXXXTXCTXCAAXX	-	-	CVIET	IRNI	SAKAA	E	--D	VDDNT-	C	I	E	T	H	S	E	I	A	I	R	N	I	S	S	A	K	A	A	E	-	-	-	-	F	D	V	D	D	N	T	-
KH-2017-3	Khartoum	Pf	1	1	AGTCGXTGTAGGCCCCTGTCXGTGGTGCCCAGCCTCGATGCTTTTATAAAAAAACAXGGACTAGTGCCATACCCAGGCTTATAACCGTTCCCGCTACAAGT	WT	-	CVIET	ICNI	SAKAA	E	NFD	VDDNIT	C	I	E	T	H	S	E	I	A	I	C	N	I	S	S	A	K	A	A	E	N	F	S	N	F	D	V	D	D	N	I	T
KH-2017-4	Khartoum	Pf	1	1	XGTTGXCGCXGANCTGCATCTGGGATGGCCTXCCACNNTXATCTTAAAAAAAGATXXAGATAAXNAATAXCCCXAGGGTXATAAATXXNXXCGCTACAGGT	WT K430E	-	CV[M/I][N/E][K/T]	NRNI	SAKAA	E	-FD	VDDNIT	C	[M/I]	[N/E]	[K/T]	H	S	E	I	A	N	R	N	I	S	S	A	K	A	A	E	-	F	-	N	F	D	V	D	D	N	I	T
KH-2017-5	Khartoum	Pf	2	2	AGTTNXTGNNNNCCNGNATCANNGATACCTAGTCANATNXATCTNANGAAANANNAXAGACNGGNGANNTNNCCAGNNNCATAAATNXCCXCGCTACANNX	WT	-	CVMNK	ICNI	SGEAA	E	[N/Y]FD	VDDNIT	C	M	N	K	H	A	-	[R/I]	A	I	C	N	I	S	S	G	E	A	A	E	[N/Y]	F	S	N	F	D	V	D	D	N	I	T
KH-2017-6	Khartoum	Pf	2	1	AGTCAXTGCAGACCNGCAACXGGAXNGGTTTGCCNCATNXCTCTCATAAAAAGANXXGGACTANCNNNANACNTAGAGTCATAACNATTCTCGCTXCNGGC	WT Q661R	-	CVIET	ICNI	S[G/A][K/E]AA	E	YFD	VDDSIT	C	I	E	T	H	S	E	I	A	I	C	N	I	S	S	[G/A]	[K/E]	A	A	E	Y	F	-	N	F	D	V	D	D	S	I	T
KH-2017-8	Khartoum	Pf	2	2	ANTNAXTGNXANCCNGNGTCANTGATACCTNXTCANATNXATCTTANGAAANNNNXXAGACNXGNNANNNANCCAGNNNCATAAANNAXCXCNCTACAXXX	-	-	CV[M/I][N/E][K/T]	ICNI	-----	E	YFD	VDDNIT	C	[M/I]	[N/E]	[K/T]	H	[A/S]	[Q/E]	[R/I]	A	I	C	N	I	S	-	-	-	-	-	E	Y	F	S	N	F	D	V	D	D	N	I	T
KH-2017-9	Khartoum	Pf	1	1	AGTCAXTGCAGACNNGCAACAGGAXNGGCTTGCCNCATNXCTCTCATAAAAANANXXNGACTANCNNTATACCTAGAGTCATAACNAXTCTCGCTTCGGGC	WT	-	CVIET	ICNI	SGEAA	E	YFD	VDDSIT	C	I	E	T	H	S	E	I	A	I	C	N	I	S	S	G	E	A	A	E	Y	F	S	N	F	D	V	D	D	S	I	T
KH-2017-10	Khartoum	Pf	1	1	XGTXAXTGCAXGCGTXCAAXXGGAXTGCCCXXTXXCXTXXCXTXTAXGCAAGGAXXXGXAXXXXCACTGXACXCAXXXCXAGXAXXAXTCXCGTTXCAAXX	-	-	CVMNK	IC--	AAK--	E	N--	VDDNI-	C	M	N	K	H	A	Q	R	A	I	C	-	-	S	A	A	K	-	-	E	N	-	-	-	-	-	V	D	D	N	I	-
KH-2017-11	Khartoum	Pf	1	1	AATTAXTGTAGACCTGTAACXGGXAXGGXTNXTXACATCXAACACATGXGGXGACXXGGCCTXXXACCGTCCGXAGACCNCXCAATXTCAXCGCTACGAGX	WT	-	CVIET	ICNI	-----	E	NFD	VDDNIT	C	I	E	T	H	S	E	I	A	I	C	N	I	S	-	-	-	-	-	E	N	F	S	N	F	D	V	D	D	N	I	T
KH-2017-12	Khartoum	Pf	1	1	XATTAXTGTXXANCTGTAACXGGAXTGGCTTXNCACATCXAACXCAXGCGGAGAXXXGGXXTAXCACCGTCXGTAXACCXCTCXATXXCAXCGCTXCGAXC	-	-	CVIET	ICNI	SAKAA	E	--D	VDDNIT	C	I	E	T	H	S	E	I	A	I	C	N	I	S	S	A	K	A	A	E	-	-	-	-	F	D	V	D	D	N	I	T
KH-2017-13	Khartoum	Pf	1	1	AGTCGGTGCAGATCTGCGACTGGAATGCCTAGTCTTATTGCTTTCAAGAAGAGACAXAGATTAACACCGAACCTCGAGCCCTAAATGACCTTGCTTCAGGC	WT	-	CVIET	NCNI	SAKAA	E	YFD	VDDSIT	C	I	E	T	H	S	E	I	A	N	C	N	I	S	S	A	K	A	A	E	Y	F	S	N	F	D	V	D	D	S	I	T
KH-2017-14	Khartoum	Pf	1	1	AGTCNGCGTAGATNCGCATCXGTAATGCCTTATCACGTTGCATTCATGAGAANATAXAGATTGGCACTGAXCCCAGAGTCATXAATATCCTCGCTXCAAAC	WT	WT	CVIET	ICNI	SGEAA	E	NFD	VDDNIT	C	I	E	T	H	S	E	I	A	I	C	N	I	S	S	G	E	A	A	E	N	F	S	N	F	D	V	D	D	N	I	T
KH-2017-15	Khartoum	Pf	2	2	GXTCXGTXNAGXNNTGXXXCXGGXXTNXCTTGNCAXGXTXCTXTTXXGXNXNNGNAXXGCCXAGXAXNXXAXXXAGXGTTXTXACNAAXXXCNXTTCNAXX	-	-	CVM--	--N-	-----	E	-[Y/F]D	V-D-IT	C	M	N	K	-	-	-	R	-	-	-	N	-	S	-	-	-	-	-	E	-	[Y/F]	-	-	F	D	V	-	D	-	I	T
KH-2017-16	Khartoum	Pf	1	1	AGTCAGTGTAGATGTCTATCATTGATACCTXGTCACATCGCTCTCATGAAAAGACAXGGATAGGTGCTGAACCTAGAGCCATAGACATCCTCGTTACGGGC	WT	-	CVIET	IRNI	SGEAA	E	NFD	VDDSIT	C	I	E	T	H	S	E	I	A	I	R	N	I	S	S	G	E	A	A	E	N	F	S	N	F	D	V	D	D	S	I	T
KH-2017-17	Khartoum	Pf	1	1	AGTTAGTGCAGATGTGTAACXGGAACGGTCTGCTTTATTGCTCTTATAAAAAGACGXAGCCAAGCAATAAACGTAGAGTTATAAACATCCTCGCTACAGAC	WT	-	CVMNK	ICNI	SAKAA	E	YFD	VDDNIT	C	M	N	K	H	A	Q	R	A	I	C	N	I	S	S	A	K	A	A	E	Y	F	S	N	F	D	V	D	D	N	I	T
KH-2017-18	Khartoum	Pf	1	1	AGTCAGTGCGAATGTCTAACAGGGATANCTAGCCACGTTGCTCTCATGAAAAGATAXAGACTGACGCCAAACGTCGACCCATAGATGACCTCGTTACGAGC	WT	WT	CVIE[K/T]	ICNI	SGEGA	E	YFD	VDDSIT	C	I	E	[K/T]	H	S	E	I	A	I	C	N	I	S	S	G	E	G	A	E	Y	F	S	N	F	D	V	D	D	S	I	T
KH-2017-19	Khartoum	Pf	1	1	AATTAATGTAGACGTGTAACXGTAATGGTTTGTTTTGTTGCATTCAAGAAAAGGCAXAGACAGGCACCATAAGCAGGGTCATAACTATCCNCGCTACAGGC	WT	-	CVMNK	IRNI	SGEGA	E	NFD	VDDNIT	C	M	N	K	H	A	Q	R	A	I	R	N	I	S	S	G	E	G	A	E	N	F	S	N	F	D	V	D	D	N	I	T
KH-2017-20	Khartoum	Pf	1	1	AGTCAATGTAGATGCGCAACTGGGATGCCTTGCCACATCGCTTTCATAAAAAAATAXGGACAAGCGCCGTACCTAGAGTCATAACTATCCTCGCTACGAGC	WT	-	CVIET	ICNI	SGEAA	E	YFD	VDDSIT	C	I	E	T	H	S	E	I	A	I	C	N	I	S	S	G	E	A	A	E	Y	F	S	N	F	D	V	D	D	S	I	T
KH-2017-21	Khartoum	Pf	1	1	AGTCGXTGCAGATCTGCGACTGGAATGCCTAGTCTTATTGCTTTCAAGAAGAGACAXAGATTAACACCGAACCTCGAGCCCTAAATGACCXTGCTTCAGGC	WT	-	CVIET	NCNI	SAKAA	E	YFD	VDDSIT	C	I	E	T	H	S	E	I	A	N	C	N	I	S	S	A	K	A	A	E	Y	F	S	N	F	D	V	D	D	S	I	T
KH-2017-22	Khartoum	Pf	2	2	AGTCAGTGNANANNNNTANCNNGGXTGNCXTGNNNCANXGANCNNAAGXNGAGNTGXAGACTAGNANNXANCXCAGGCNTAGXANCANCAXCGCTTCNNNT	-	-	CV[M/I][K/E]T	ICNI	S[G/A]KAA	E	YFD	VDD[N/S][I/T]T	C	[M/I]	[K/E]	T	H	S	-	I	A	I	C	N	I	S	S	[G/A]	K	A	A	E	Y	F	S	N	F	D	V	D	D	[N/S]	[I/T]	T
KH-2017-23	Khartoum	Pf	-	-	XXTXAXTGNXXXXGXXCATXNXNXXTXCXNNXXXNNATNXNXNXCXXNAANANAXXXXGXCXXXCNXCNTAXXXAXXXXXAXXXXNXXXCXCGCXXCXNXX	-	-	CVIET	IC--	-----	E	---	VDDSI-	C	I	E	T	H	S	E	I	A	I	C	-	-	S	-	-	-	-	-	E	-	-	-	-	-	-	V	D	D	S	I	-
KH-2017-24	Khartoum	Pf	1	1	AGTCAXCGCGGATGTGTAACTGTGATGCCCAGCTTCGTCGATCTCAAGAGAAAATAXGGACTGGCGCCGTACCTAGAGTTATAAACATCCCCGCTATAAGC	WT	-	CVMNK	ICNI	SAKAA	E	YFD	VDDNIT	C	M	N	K	H	A	Q	R	A	I	C	N	I	S	S	A	K	A	A	E	Y	F	S	N	F	D	V	D	D	N	I	T
KH-2017-26	Khartoum	Pf	1	1	AGTTAXTGTAAACCTGTATCXTTGATACCTAGCTACGTCGCTTTCATACAAGGATAXGGACTAGCGCTATACGXAGACCCATAACCGXCCXCGCTXCAGAC	WT	-	CVMNK	ICNI	SGEGA	E	YFD	VDDNIT	C	M	N	K	H	A	Q	R	A	I	C	N	I	S	S	G	E	G	A	E	Y	F	-	-	F	D	V	D	D	N	I	T
KH-2017-27	Khartoum	Pf	-	-	XXTCAXTGXXGXXGXXXXNXTGGGXXGXXXXGXXXCXTXXXTTTXXXAXAAAAAXXXXGXXXXXXXCXXTAXXXAGXXXXAXXXXTXXCCXCGCXXCGAXX	-	-	-----	--N-	-----	E	---	VDD-IT	-	-	-	-	H	-	-	[R/I]	-	-	-	N	-	-	-	-	-	-	-	E	-	-	-	-	-	-	V	D	D	-	I	T
KH-2017-31	Khartoum	Pf	1	1	AGTCGGTGTAGGCCCCTGTCAGTGGTGCCCAGCCTCGATGCTTTTATAAAAAAACAXGGACTAGTGCCATACCCAGGCTTATAACCGTTCCCGCTACAAGT	WT	-	CVIET	ICNI	SAKAA	E	NFD	VDDNIT	C	I	E	T	H	S	E	I	A	I	C	N	I	S	S	A	K	A	A	E	N	F	S	N	F	D	V	D	D	N	I	T
KH-2017-32	Khartoum	Pf	1	1	ANXTAXTGCAAATGTCTGACATTGXTGXTCTGTCACATCGCACTTATGAAAAGACGXXGACAGGNAACAXCACTAGGGTCATXAXCGACXXCGCTTCAAAT	-	-	CV[M/I][N/E][K/T]	ICNI	SGEAA	E	NFD	VDDNIT	C	[M/I]	[N/E]	[K/T]	H	S	E	I	A	I	C	N	I	S	S	G	E	A	A	E	N	F	S	N	F	D	V	D	D	N	I	T
KH-2017-34	Khartoum	Pf	1	1	AGTCAGTGCGAATGTCTAACXGGGATACCTAGCCACGTTGCACTCATGAAAAGATAXACACTGGCACCGAACCCCGACCCATAAATGACCTCGNTACAAAT	WT	-	CV[M/I][N/E][K/T]	ICNI	SGEGA	E	YFD	VDDSIT	C	[M/I]	[N/E]	[K/T]	H	S	E	I	A	I	C	N	I	S	S	G	E	G	A	E	Y	F	S	N	F	D	V	D	D	S	I	T
KH-2017-35	Khartoum	Pf	1	1	AGTCAXTGTAGATGCGTAACTGGGATGCCTTGCCACAACGCTTTCATAAAAAAATAXGGACAAGCGCCGTCCCTAGAGTCATAACTATCCTCGCTACGAGT	WT	-	CVIET	ICNI	S[G/A]KAA	E	YFD	VDDSIT	C	I	E	T	H	S	E	I	A	I	C	N	I	S	S	[G/A]	K	A	A	E	Y	F	S	N	F	D	V	D	D	S	I	T
KH-2017-36	Khartoum	Pf	2	2	AGTNANNGTAGNNGTNCATNANGNNTAGCNTNTNACGNCGNTCTCAAGAANNAANGXAGACANNCGACNTACNNAGGNTCNNNNACNTCNTCGNTTCANAT	WT	-	CVMNK	ICNI	SAKAA	E	N[Y/F]D	VDDNIT	C	M	N	K	H	A	Q	R	A	I	C	N	I	S	S	A	K	A	A	E	N	[Y/F]	S	N	F	D	V	D	D	N	I	T
KH-2017-39	Khartoum	Pf	1	1	AGTCAGCGCGGATGTGTGACNGTAATGGCCAACTATGTCGATCTCAAGAAAGGATAXGGACTGGCGCCGTCCCTAGGGTTATAAACATCCCCGTTATAAAC	WT	WT	CVMNK	ICNI	SAKAA	E	YFD	VDDNIT	C	M	N	K	H	A	Q	R	A	I	C	N	I	S	S	A	K	A	A	E	Y	F	S	N	F	D	V	D	D	N	I	T
KH-2017-40	Khartoum	Pf	1	1	AATTAXCGCAAGCGTGTAACTTGAGTGCCTAGTCTCAATGATTTTAAGCAAGGACAXAGATTGGCAACGTACGTAGGGCCATAACCGTCCTCGCTACAAGC	WT	-	CVIET	ICNI	SAKAA	E	NFD	VDDNIT	C	I	E	T	H	S	E	I	A	I	C	N	I	S	S	A	K	A	A	E	N	F	S	N	F	D	V	D	D	N	I	T
KH-2017-41	Khartoum	Pf	1	1	XATTAXNGTANATCNXTGACATNGATGXCTTGCCNCANTXNACTTAXAAAGNGATXXAGACAXAXAATANACGXAGANNTAXAAATXXCCXCACNTTAAXX	-	-	CVMNK	ICNI	S-EGA	E	NYD	VDDNIT	C	M	N	K	H	A	Q	R	A	I	C	N	I	S	S	G	E	G	A	E	N	Y	S	N	F	D	V	D	D	N	I	T
KH-2017-42	Khartoum	Pf	1	1	AATCAGTGTAAACGTGCATCAGTAATAGCCTGCCACGTTGCTCTCAAGCAGGGATAXAGACTAGCACCGTACCTAGGGTCAGAAACAATATCGCTACAGAT	WT L488L	-	CVMNK	IRNI	SGEAA	E	NFD	VDDNIT	C	M	N	K	H	A	Q	R	A	I	R	N	I	S	S	G	E	A	A	E	N	F	S	N	F	D	V	D	D	N	I	T
KH-2017-43	Khartoum	Pf	1	1	XGTNAXTGNAGATGCGCNACTGXGATGCCXTGCCACAXCXCTTXCXTAXAAAAATXXXGACXAXCGCCXTACCXAGAXXCATXXXXXXCCTCGCTACGAXX	-	-	CVIET	ICNI	-----	E	YF-	VDDSIT	C	I	E	T	H	S	E	I	A	I	C	N	I	S	-	-	-	-	-	E	Y	F	S	N	-	-	V	D	D	S	I	T
KH-2017-44	Khartoum	Pf	1	1	AATTAGCGTAGATCTGCATATGTGATAGCTAGTCACGTCGCTTATAAAAAAGGATAXAGCCTAGTAATGTACGTAGGGCTATAAACATCATCGCTACGGAT	WT Y635C	-	CVMNK	ICNI	AAKAA	E	NFD	VDDNIT	C	M	N	K	H	A	Q	R	A	I	C	N	I	S	A	A	K	A	A	E	N	F	S	N	F	D	V	D	D	N	I	T
KH-2017-45	Khartoum	Pf	1	1	XGTCAXTGCXAACGTGCAAXAGGXGCACCTAGCTACGTTXATCTCAXAAAAAGAXXXAGATTXGXACTGTACGXAGAGTCATCAACAXCCTCACTXTAAAX	WT	-	CVIET	ICNI	SGEGA	E	NFD	VDDSIT	C	I	E	T	H	S	E	I	A	I	C	N	I	S	S	G	E	G	A	E	N	F	S	N	F	D	V	D	D	S	I	T
KH-2017-46	Khartoum	Pf	1	1	AGTCGGTGTAGGTGTGTATCAGGGATGGCTAGTCACATCGAATTCATAAAGGGATAXAGACTAGCACCGTACCCCGGGTCATAAATATCCCCGCTACGGAT	WT	-	CVMNK	IRNI	SGEAA	E	NFD	VDDNIT	C	M	N	K	H	A	Q	R	A	I	R	N	I	S	S	G	E	A	A	E	N	F	S	N	F	D	V	D	D	N	I	T
KH-2017-48	Khartoum	Pf	-	-	XGTXAXTGXXXXCGTXCGAXXTXXXXAXCXXXCXXTXAXXCXXXTAXXAGAAXAXXXXXAXXAXXXXTXXAACXXXXXXXAXXAXXXXCAXTGCTXCXAXX	-	-	CVMNK	IR--	-----	-	---	VD----	C	M	N	K	-	A	-	R	A	I	R	N	I	S	-	-	-	-	-	-	-	-	-	-	-	-	V	D	-	-	-	-
KH-2017-49	Khartoum	Pf	1	1	AXXCGAXXTAGXTXXCXXXCXXTGAXAXXCAGCCNXGXCXXTCTXXXGXAXXGATAXXGACXXGXAXCGTXXCXAGXCTCXXXXACATCXXXGXTTCANXX	-	-	-----	--NI	-----	E	NFD	--D-IT	-	-	-	-	H	-	E	-	-	-	-	N	I	-	-	-	-	-	-	E	N	F	S	N	F	D	-	-	D	-	I	T
KH-2017-50	Khartoum	Pf	2	1	AGTTAGTGNAGNTNTGCAACAGTGATGGTCTGCCTCNTCXNNTACANGAAANGANAXAGATAAGCACCNTACCTNGNCTCATNAACGACCTCGCTTTAGNN	WT D389H	-	CVMNK	ICNI	SGEAA	E	NFD	VDDNIT	C	M	N	K	H	A	Q	R	A	I	C	N	I	S	S	G	E	A	A	E	N	F	S	N	F	D	V	D	D	N	I	T
KH-2017-51	Khartoum	Pf	1	1	XGTXGXTAXAXGCGTCCGAXXGXXGTGCCTXXTCATAACGCACXCAAAAAAAXATXXAGCCTGGTAATXTACCXAXGCTCATXACXGXCCXTGCTXCAAGC	WT K378R	WT	CVMNK	ICNI	SGEGA	E	NFD	VDDN-T	C	M	N	K	-	A	Q	R	A	I	C	N	I	S	S	G	E	G	A	E	N	F	S	N	F	D	V	D	D	N	-	T
KH-2017-52	Khartoum	Pf	1	1	AGTTAXTGCANNCCTGCAACANTNNCAGCTAGNTACATTXNACTCAXANAAAGATAXGGACAAGCACTATACCTAGGCTCANAAXCNTCCXCGCTNCAGGX	-	-	CV[M/I][N/E][K/T]	ICNI	S[G/A][K/E]AA	E	YYD	VDDNTT	C	[M/I]	[N/E]	[K/T]	H	S	E	[R/I]	A	I	C	N	I	S	S	[G/A]	[K/E]	A	A	E	Y	Y	S	N	F	D	V	D	D	N	T	T
KH-2017-53	Khartoum	Pf	1	1	AGTCAXTGTAGATGCGCAACTGGGATGNCTTGCCACATCGCTTTCATAAAAAAATXXGGACAAGCGCCGTACCTAGAXTCATAACTATCCTCGCTXCGAGC	WT E509E	-	CVIET	ICNI	SGEAA	E	YFD	VDDSIT	C	I	E	T	H	S	E	I	A	I	C	N	I	S	S	G	E	A	A	E	Y	F	S	N	F	D	V	D	D	S	I	T
KH-2017-54	Khartoum	Pf	1	1	AGTCAGTGTAAATGTCCATAXGGGATGGCTTGCTTCATCGCTCTTATGCAAAGATAXAGACTAGTACCGTCCGTAGGGTCATAGACATTCCCGCTACAAAC	WT	-	CVMNK	ICNI	SGEAA	E	YFD	VDDNIT	C	M	N	K	H	A	Q	R	A	I	C	N	I	S	S	G	E	A	A	E	Y	F	S	N	F	D	V	D	D	N	I	T
KH-2017-55	Khartoum	Pf	1	1	AGTTAATGCGGACGTCTATCATTAATACCTTGCCNCATTCATCTCATGCAAAAATAXAGACTGGTGCTATACCTAGGCCCATAGCCATCCTCGTTTCAAGC	WT	WT	CVIET	IRNI	SGEAA	E	NFD	VDDSIT	C	I	E	T	H	S	E	I	A	I	R	N	I	S	S	G	E	A	A	E	N	F	S	N	F	D	V	D	D	S	I	T
KH-2017-57	Khartoum	Pf	1	1	AGTCAACGTAAATGTCTAACXGGGATACCTTGCCACGTTGATTTCAAGAAGAGACAXGGACTGGTACTAACCCCCGACCCATCAACATCCTCGCTACAGAC	WT	-	CVMNK	ICNI	SGEGA	E	NFD	VDDNIT	C	M	N	K	H	A	Q	R	A	I	C	N	I	S	S	G	E	G	A	E	N	F	S	N	F	D	V	D	D	N	I	T
KH-2017-58	Khartoum	Pf	1	1	AGTCAGTGCAGACCTGTGTCTTTAATAGCCTGTTACATCGAATTCAAGAGAAGACAXAGATTGGCAATXTACCCAGGCTTATXAACGTXAXTGCTACAGGT	WT	-	CVMNK	ICNI	SGEAA	E	NFD	VDDNIT	C	M	N	K	H	A	Q	R	A	I	C	N	I	S	S	G	E	A	A	E	N	F	S	N	F	D	V	D	D	N	I	T
KH-2017-59	Khartoum	Pf	1	1	GATCGGCGCAAACGTGCATCAGTGGTGXCTAGTTACATTXCATTTAAAAAGAGATAXACACTGGCGACGTAAGTAGGGTCATAAATATCAXCGCTACAGAC	WT	-	CVMNK	IRNI	SGEGA	E	NFD	VDDNIT	C	M	N	K	H	A	Q	R	A	I	R	N	I	S	S	G	E	G	A	E	N	F	S	N	F	D	V	D	D	N	I	T
KH-2017-60	Khartoum	Pf	2	2	AGTCGXTGCANNCGTGNANCNNNANTANCNNGNCNNNNTXCTCTCANAAAAAGNTXXGGACTNGNGNCNNNCNNNGGGTTATANNNNXCATNGCTTCAGGN	WT A504T	-	CVIET	ICNI	AAKAA	E	NYD	VDDN[I/T]T	C	I	E	T	H	S	E	I	A	I	C	N	I	S	A	A	K	A	A	E	N	Y	S	N	F	D	V	D	D	N	[I/T]	T
KH-2017-61	Khartoum	Pf	2	2	ANTTAGTGTANNCGNGTANCAGGAATACCTTGCCACNTXGCNTANANGAAAAGATNXAGACANGCNCCATANNNCNNGCTATNAANANCCCCGCTACAAGN	WT	WT	CVMNK	ICNI	S[G/A][K/E][A/G]A	E	YFD	VDDNIT	C	M	N	K	H	A	Q	R	A	I	C	N	I	S	S	[G/A]	[K/E]	[A/G]	A	E	Y	F	S	N	F	D	V	D	D	N	I	T
KH-2017-62	Khartoum	Pf	1	1	AGTCGGTGTAAATGTCCATCATTGGCACCCTGTTATAACCATTTTGAACAAAGGCAXAGACTAACACCATACGCAGGGCCATAGCCATCCTCGCTACAGGC	WT	WT	CVMNK	ICNI	SAKAA	E	NFD	VDDNIT	C	M	N	K	H	A	Q	R	A	I	C	N	I	S	S	A	K	A	A	E	N	F	S	N	F	D	V	D	D	N	I	T
KH-2017-63	Khartoum	Pf	1	1	AGTCAXTGCAGATCCGTATCATTGATGCCTAGTCACATCGATCTCATGAAAAAACAXAGACTGGCAACATCCCCAGAGCCATXAATATCCTCGCTACAAAC	WT	-	CVIET	ICNI	SGEAA	E	YFD	VDDSIT	C	I	E	T	H	S	E	I	A	I	C	N	I	S	S	G	E	A	A	E	Y	F	S	N	F	D	V	D	D	S	I	T
KH-2017-64	Khartoum	Pf	1	1	XGTCAXTGTAGATGCGCAACTGGGATGCCTTXCCACATCXCTTTCATAAAAAAATXXGGACAXGCGCCGTACCTAGAGTCATXACTXXCCXCGCTACGAGC	WT R575T	-	CVIET	ICNI	SGEAA	E	YFD	VDDSIT	C	I	E	T	H	S	E	I	A	I	C	N	I	S	S	G	E	A	A	E	Y	F	-	-	F	D	V	D	D	S	I	T
KH-2017-65	Khartoum	Pf	1	1	AGTCAGTGTAAGTGTGTGTAXGTAATGGCCTGTCACGTCGAATATAAACGAAGACAXAGACAAGCGCTGTACCCAGAGTCAGAACCGACCTCGTTTCAGGT	WT	WT	CVMNK	ICNI	AAKAA	E	NFD	VDDNIT	C	M	N	K	H	A	Q	R	A	I	C	N	I	S	A	A	K	A	A	E	N	F	S	N	F	D	V	D	D	N	I	T
KH-2017-66	Khartoum	Pf	1	1	AGTCAATGTAGATGCGCAACTGGGATGCCTAGCCACATCGCTTTCATGAAAAAATAXGGACTGGCGCCGAACCTAGAGTCATAACTATCCTCGCTACGAGC	WT	-	CVIET	ICNI	SGEAA	E	YFD	VDDSIT	C	I	E	T	H	S	E	I	A	I	C	N	I	S	S	G	E	A	A	E	Y	F	S	N	F	D	V	D	D	S	I	T
KH-2017-67	Khartoum	Pf	1	1	AATCAGTGCAGATGTCCATCTGGAATAGCTTGTTATGATXCTCTTATGCAGGGGTAXGGATAAGCGCCGTACCCCGGCCCATAGACGTTCXCGTTACGAGT	WT	-	CV[M/I][N/E][K/T]	ICNI	SGEAA	E	NYD	VDDNTT	C	[M/I]	[N/E]	[K/T]	H	S	E	I	A	I	C	N	I	S	S	G	E	A	A	E	N	Y	S	N	F	D	V	D	D	N	T	T
KH-2017-68	Khartoum	Pf	1	1	AGTCGXTGTGXAXGTXCATCXGGXATAGCCAGTCACATCCCTCXTAAGAAAAGACXXACACAAGTAATGTACGTCGGGTCATAAACATTCTTGCTXCAGAC	-	-	CVIET	ICNI	SGKAA	E	NFD	VDDNTT	C	I	E	T	H	S	-	I	A	I	C	N	I	S	S	G	K	A	A	E	N	F	-	-	F	D	V	D	D	N	T	T
KH-2017-69	Khartoum	Pf	1	1	AGTCAGTGCGAACGTGCAACXGGGXCACCTTGCCNCGTTGCTCTCATGAAAAGATAXACCCTNGCACTAAACGCAGAGTCATAACCATCCTCGCTTCAGXC	WT	-	CVIET	ICNI	SGEGA	E	YFD	VDDSIT	C	I	E	T	H	S	E	I	A	I	C	N	I	S	S	G	E	G	A	E	Y	F	-	N	F	D	V	D	D	S	I	T
KH-2017-70	Khartoum	Pf	1	1	AGTTAGTGCAAATGTGCATCNGGAGCAGNCAGCCATAACGCTTTTAXGAAAGGATGXAGACAGGXGATGTCCCTAGAGCCATAAACGACCXCGCTACAAAX	-	-	CVI[K/E]T	I[C/R]NI	SGEAA	E	NFD	VDDNIT	C	I	[K/E]	T	H	S	E	I	A	I	[C/R]	N	I	S	S	G	E	A	A	E	N	F	S	N	F	D	V	D	D	N	I	T
KH-2017-71	Khartoum	Pf	-	-	XGTXAXTGXAXAXGTXTATXXGXXXNXGCXXXNXXTXAXXAXXXTAXXAXAAXAXXXGXAXTXXCXNTXXACXXXXXXTXAXXNXXNXXCXCGCTXXXXXC	-	-	CVIET	IC--	SAK--	-	Y--	VD-N--	C	I	E	T	-	S	E	I	A	I	C	-	-	S	S	A	K	-	-	-	Y	-	-	-	-	-	V	D	-	N	-	-
KH-2017-72	Khartoum	Pf	1	1	AGTCGGCGTGAACXTCTATXAGGAXCGCCTTGCTTTGXTGATCTCAAGCAAAGATAXAGACTAGCGCCGAACCTAGAGTTATXAACGTCCCCGCTACAGGC	WT	-	CVIET	ICNI	SGEAA	E	YFD	VDDSIT	C	I	E	T	H	S	E	I	A	I	C	N	I	S	S	G	E	-	-	E	Y	F	S	N	F	D	V	D	D	S	I	T
KH-2017-74	Khartoum	Pf	1	1	AGTCGXCGCAGGTCTGTGTCAGGAATGGCTTGTTTCATTCCACTCATGCAAAGGCAXAGACAGNCGCCGAACCTAGGGTXATAAACAXCCTCGCTTCAAAT	WT	-	CVIET	ICNI	SAKAA	E	YYD	VDDNIT	C	I	E	T	H	S	E	I	A	I	C	N	I	S	S	A	K	A	A	E	Y	Y	S	N	F	D	V	D	D	N	I	T
KH-2017-75	Khartoum	Pf	1	1	XGTXAXTGXGAATGTGTGAXXGXGXTACCTXGTXXCXTCXCXXXTAXXAAAAXAXGXAXACAAGTXCTXTACXTXXAXTXAGXAXXGACCXCGCTACXGAT	WT	-	CVIET	ICNI	SGEAA	E	---	VD-S-T	C	I	E	T	-	S	E	I	A	I	C	N	I	S	S	G	E	A	A	E	-	-	-	-	-	-	V	D	-	S	-	T
KH-2017-76	Khartoum	Pf	1	1	AATCAGTGCAAACGTCCATCXTGGGTGGCTAACCTCATTGCACTTATAAGGAGATAXACACTAGTGCCXTCCCTAGGGTCATAAACGACCCCGCTTTAAGC	WT	-	CVIET	ICNI	SGKAA	E	NFD	VDDNIT	C	I	E	T	H	S	E	I	A	I	C	N	I	S	S	G	K	A	A	E	N	F	S	N	F	D	V	D	D	N	I	T
KH-2017-77	Khartoum	Pf	2	1	AGTNNGTGTXGACGTCTATCAGTGATGCCTTGTCANATTGCTTTTATACAANGNTAXGNACNGATGNCAAACNTAGGCNTANAANCNTTATCGCTNTAGGX	WT	WT	CV[M/I][N/E][K/T]	IRNI	S[G/A][K/E]AA	E	YFD	VDDNIT	C	[M/I]	[N/E]	[K/T]	H	[A/S]	Q	[R/I]	A	I	R	N	I	S	S	[G/A]	[K/E]	A	A	E	Y	F	S	N	F	D	V	D	D	N	I	T
KH-2017-80	Khartoum	Pf	1	1	XGTCAXCGTAAGCCTGTATCTGTGAXAXCTAXTTTCATTXAATTTATGAAAAGATXXAGACTAGXACTGAACGTAGACTTATAACTATTCTCGCTACAGAT	-	-	CVMNK	ICNI	SGEAA	E	YFD	VDDNIT	C	M	N	K	H	A	Q	R	A	I	C	N	I	S	S	G	E	A	A	E	Y	F	-	N	F	D	V	D	D	N	I	T
KH-2017-82	Khartoum	Pf	1	1	AGTCAGCGCGGATGTGTAACTGTGATGCCCAGCTTCGTCGATCTCAAGAGAAAATAXGGACTGGCGCCGTACCTAGAGTTATAAACATCCCCGCTATAAGC	WT	WT	CVMNK	ICNI	SAKAA	E	YFD	VDDNIT	C	M	N	K	H	A	Q	R	A	I	C	N	I	S	S	A	K	A	A	E	Y	F	S	N	F	D	V	D	D	N	I	T
KH-2017-83	Khartoum	Pf	1	1	XGTCGXTGTAAATCTGCAACTGGAATGCCTTGTCNTATTGCTCTCAAAAAAAGACAXAGCCAAACACTAACCGTCGACCCATAACCGXCCTCGCTACAGAC	WT	-	CVIET	ICNI	SGEGA	E	YFD	VDDSIT	C	I	E	T	H	S	E	I	A	I	C	N	I	S	S	G	E	G	A	E	Y	F	S	N	F	D	V	D	D	S	I	T
KH-2017-87	Khartoum	Pf	1	1	XGTTAXTGTAGGTGTGTATCATGGXTGCTNAGTCTCGTTXCTCTTAXGAAAAGATXXAGACTAGTGACATACCCAGAGTTATXAACGXCCXCGCTXCAAGT	WT Y541H	-	CVIET	ICNI	SGEAA	E	YYD	VDDSIT	C	I	E	T	H	S	E	I	A	I	C	N	I	S	S	G	E	A	A	E	Y	Y	S	N	F	D	V	D	D	S	I	T
KH-2017-88	Khartoum	Pf	1	1	AGTCAXCGCAAACGCGTATCAGTGACGGCTTGTCTCAACXNTCTCATGAAAAGATXXAGATTAGXGXCATCACCAGXGTTATXGCCNXCCXCGCTXCAGGT	-	-	CVIET	ICNI	SAKAA	E	YFD	VDDSIT	C	I	E	T	H	S	E	I	A	I	C	N	I	S	S	A	K	A	A	E	Y	F	S	N	F	D	V	D	D	S	I	T
KH-2017-89	Khartoum	Pf	1	1	GGTCGGCGTAGACGTGTGACTGGGATGGCCAGCCACAACGATCTTATAAAGAGATAXGCACTAGTACCGAACCTAGAGTCATAAATGACCTCGCTACAGGC	WT	-	CVIET	IRNI	SGEAA	E	YFD	VDDNTT	C	I	E	T	H	S	E	I	A	I	R	N	I	S	S	G	E	A	A	E	Y	F	S	N	F	D	V	D	D	N	T	T
KH-2017-90	Khartoum	Pf	1	1	AGTTGGCGCAGACCTGTAACTGTGATAGCTTGCTACATCGCTTTCATACGGAGGCGXAGACTAGCAACATCCCCAGAGTCATAGACGACCCTGCTACAGGT	WT	-	CVMNK	IRNI	SGEAA	E	NYD	VDDNIT	C	M	N	K	H	A	Q	R	A	I	R	N	I	S	S	G	E	A	A	E	N	Y	S	N	F	D	V	D	D	N	I	T
KH-2017-92	Khartoum	Pf	1	1	AGTTGGCGCAGACCTGTAACTGTGATAGCTTGCTACATCGCTTTCATACGGAGGCGXAGACTAGCAACATCCCCAGAGTCATAGACGACCCTGCTACAGGT	WT	WT	CVMNK	IRNI	SGEAA	E	NYD	VDDNIT	C	M	N	K	H	A	Q	R	A	I	R	N	I	S	S	G	E	A	A	E	N	Y	S	N	F	D	V	D	D	N	I	T
KH-2017-93	Khartoum	Pf	1	1	GATCAXTGTAAACCTGCGTCAGGGACACCTAATCATGTCGATTTTAAACAAAGATAXGGATAAATACTATAACTAGGGTTATAAACATTCXCGTTTCAAGT	WT	-	CVIET	ICNI	SGEAA	E	NFD	VDDNTT	C	I	E	T	H	S	E	I	A	I	C	N	I	S	S	G	E	A	A	E	N	F	S	N	F	D	V	D	D	N	T	T
KH-2017-94	Khartoum	Pf	1	1	AATCAXTGCAGGTGTCTATCXGGAATGXXTTGTCTCGTCXAATTTAXAXAAGAATAXXGACAXGXGCCGTXCXXAGGGTCATAAACXACAXCNTAACAGXX	-	-	CVMNK	NCSI	SAKAA	E	NFD	VDDNIT	C	M	N	K	H	A	Q	R	A	N	C	S	I	S	S	A	K	A	A	E	N	F	S	N	F	D	V	D	D	N	I	T
KH-2017-95	Khartoum	Pf	1	1	XGTXAXTGCXXATCCGTATXATTGXXGXCXAXTXACATXXAXCXCAXGXAXANAXXXXGXCTXXXAXCATCCXXAGAGCXAXAXXXXXXCXCGCTXCAAXX	-	-	CVIET	----	-----	E	---	VDDSIT	C	I	E	T	H	S	E	I	-	-	-	-	-	-	-	-	-	-	-	E	-	-	-	-	-	-	V	D	D	S	I	T
KH-2017-96	Khartoum	Pf	1	1	XGTCAXTGCNAATCNGCATCXGNNXCAXCTTGTCNCATCXCTCXCATGAAAANANXXXGACXXNCAXTNAACNXAGAGTCATAXCTXXCCXCGCTXCAGXX	WT	-	CV[M/I][N/E][K/T]	ICNI	SG[K/E][A/G]A	E	---	VDDSIT	C	[M/I]	[N/E]	[K/T]	H	S	E	I	A	I	C	N	I	S	S	G	[K/E]	[A/G]	A	E	-	-	-	-	-	-	V	D	D	S	I	T
KH-2017-97	Khartoum	Pf	1	1	AGTCGGTGCAGATGCCCGTCATTGATGGCTTGTCATAATCCTCATATACAAAAACGXAGACAAGTACCATAACCAGAGTTATNAACATCACCGCTACAAAT	WT	WT	CVIET	ICNI	SGEAA	E	NFD	VDDNTT	C	I	E	T	H	S	E	I	A	I	C	N	I	S	S	G	E	A	A	E	N	F	S	N	F	D	V	D	D	N	T	T
KH-2017-99	Khartoum	Pf	1	1	AGTCAGCGTGAACGTCCGACTTTGGTACCCTGTCACATCGCATTTAAGCGGGAGCAXAGCCTAGCGCTGTACCTCGAGTTAGAACCATTATCGCTTCAAGC	WT	WT	CVMNK	ICNI	SAKAA	E	YFD	VDDNIT	C	M	N	K	H	A	Q	R	A	I	C	N	I	S	S	A	K	A	A	E	Y	F	S	N	F	D	V	D	D	N	I	T
KH-2017-100	Khartoum	Pf	2	1	AGTCNATGTAGXTNXGXXNXTGGGXTXXCTTXXCACATCXNNTTNAXNANNANATAXXGACAAGCXCCNTACCTAGAGTCAXXAXTATXCXCGCTXCGAGC	WT Q661P	-	CV---	ICNI	SAKAA	E	YFD	VDD[N/S]I-	C	-	-	-	H	-	E	[R/I]	A	I	C	N	I	S	S	A	K	A	A	E	Y	F	S	N	F	D	V	D	D	[N/S]	I	-
KH-2017-101	Khartoum	Pf	1	1	AGTCAGCGCAGXTNTGCNTCATGGATGXTCTGTTATATTCNATTTAAANAAGGATGXGGATAAACAACGTACCCAGGGTTATCAACATTCXCGCTTTAAAC	WT	WT	CVMNK	ICNI	SGEAA	E	NYD	VDDNIT	C	M	N	K	H	A	Q	R	A	I	C	N	I	S	S	G	E	A	A	E	N	Y	S	N	F	D	V	D	D	N	I	T
KH-2017-102	Khartoum	Pf	1	1	AGTCAATGTAGATGCGCAACTGGGATGCCTTGCCACATCGCTTTCATAAAAAAATAXGGACAAGCGCCGTACCTAGANTCATAACTATCCTCGCTACGAGC	WT	-	CVIET	ICNI	SGEAA	E	YFD	VDDSIT	C	I	E	T	H	S	E	I	A	I	C	N	I	S	S	G	E	A	A	E	Y	F	S	N	F	D	V	D	D	S	I	T
KH-2017-103	Khartoum	Pf	1	1	AGTXGXTGCGGACGTXTATCXGGGGTGCCCTGCCACATTXCTCTCATGAAAAGACAXAGCXTAGTGCTAAACCTAGAGTCATXAACAACCXTGCTXCAGXC	-	-	CVIET	ICNI	SAKAA	E	NYD	VDDNIT	C	I	E	T	H	S	E	I	A	I	C	N	I	S	S	A	K	A	A	E	N	Y	S	N	F	D	V	D	D	N	I	T
KH-2017-104	Khartoum	Pf	1	1	AXTTAXNGCXGACCCCTAACAXTAGTXXCTAGTCTXGTTXATCTTAAGXAXXGXCXXXGAXAXGXAXCAAAXCXAGGXTTATXXACGTCXXXGXTXCAAXX	-	-	CVMNK	IRNI	SGEGA	E	-FD	VDDNIT	C	M	N	K	H	A	Q	R	A	I	R	N	I	-	S	G	E	G	A	E	-	F	S	N	F	D	V	D	D	N	I	T
KH-2017-105	Khartoum	Pf	1	1	XGTTAXTGCAXXTGTXCATCAGXGXTGXXTTGTCATGTXXNTXXTAXAAAAAGAXXXGGACTXXXAACXACCXXAXXXCXAGXXXNXXCCCCATTXCAAXX	-	-	CVIET	ICNI	SAKAA	E	---	VDDNIT	C	I	E	T	H	S	E	I	A	I	C	N	I	S	S	A	K	A	A	E	-	-	-	-	-	-	V	D	D	N	I	T
KH-2017-106	Khartoum	Pf	1	1	AGTCAXTGTAGATGCGCAACTGGGATGCCTTGCCACATCGCTTTCATAAAAAAATAXGGACAAGCGCCGTACCTAGAGTCATAACTATCCTCGCTACGAGC	WT	-	CVIET	ICNI	SGEAA	E	YFD	VDDSIT	C	I	E	T	H	S	E	I	A	I	C	N	I	S	S	G	E	A	A	E	Y	F	S	N	F	D	V	D	D	S	I	T
KH-2017-107	Khartoum	Pf	1	1	AGTTGGTGCGAATCTGCAACATTAACACCTTGCCACATTGCACTTATGAGAAGGTGXAGATTAGCACCGTACCCAGAGTTATCAACATTACTGCTACGGAT	E433D	-	CVIET	NCSI	SAKAA	E	NFD	VDDNIT	C	I	E	T	H	S	E	I	A	N	C	S	I	S	S	A	K	A	A	E	N	F	S	N	F	D	V	D	D	N	I	T
KH-2017-108	Khartoum	Pf	1	1	AGTTGXTGCGAATGTGTATCXGGAXTGGCTAGCCACGATCAXCTCAAGAAAAAGCAXGGACTGGCAACGAACXTAGAGCCATAGACATTCXCGCTXCAAAT	WT T677I	-	CVIET	ICNI	SAKAA	E	Y-D	VDDSIT	C	I	E	T	H	S	E	I	A	I	C	N	I	S	S	A	K	A	A	E	Y	-	-	-	F	D	V	D	D	S	I	T
KH-2017-109	Khartoum	Pf	1	1	AGTTAATGTAGACGTCCGACATGGGTGCCTAGTCATATTNCTTTCAXGAAAAGGCAXAGACAGGTGCTGTCAGTCGAGCCCTAAATATCCXCGCTTCAAAC	WT	-	CVIET	IRNI	AAKAA	E	NFD	VDDNIT	C	I	E	T	H	S	E	I	A	I	R	N	I	S	A	A	K	A	A	E	N	F	S	N	F	D	V	D	D	N	I	T
KH-2017-110	Khartoum	Pf	2	2	ANTTGNTGNNAANNNGCAACATNNANANCTTGNCACNTNXCNNNTANGANANGGNNXAGANAAGCGCCNTACCCAGNNTTATNAACNNTANNGCTNCNGNT	WT E433D	-	CV[M/I][N/E][K/T]	[N/I]-SI	S[G/A]KAA	E	N[Y/F]D	VDDNIT	C	[M/I]	[N/E]	[K/T]	H	S	[Q/E]	[R/I]	A	[N/I]	C	S	I	S	S	[G/A]	K	A	A	E	N	[Y/F]	S	N	F	D	V	D	D	N	I	T
KH-2017-111	Khartoum	Pf	1	1	AGTCAXTGTAAGCGTGTAACAGTAATGGCTAGTCTTATCGATTTTAAGAGGAGACGXAGACTGGTACTGTACCTAGACTTAGCAATGTTACCACTACAGAC	WT	-	CVMNK	NCSI	SAKAA	E	YYD	VDDNIT	C	M	N	K	H	A	Q	R	A	N	C	S	I	S	S	A	K	A	A	E	Y	Y	S	N	F	D	V	D	D	N	I	T
KH-2017-112	Khartoum	Pf	1	1	AATTAGTGCGGGCCCCCAACTGTGATAGCTAGCCTCAACGATCTCAAGAAGAGGTAXAGACTGGTACCGTACCTAGAGCTAGAAACATCCCTGTTATAAGC	WT	-	CVIET	ICNI	SAKAA	E	YFD	VDDNTT	C	I	E	T	H	S	E	I	A	I	C	N	I	S	S	A	K	A	A	E	Y	F	S	N	F	D	V	D	D	N	T	T
KH-2017-113	Khartoum	Pf	1	1	AGTTGGTGTAAACGTGTAACXGTAATAGCTAGTTACATCGCTCTTATGAAGGGATAXGGACTAGTAACGTAAGCAGGGTCATAAATGACCCCGCTACAAAT	WT	-	CVMNK	ICNI	SAKAA	E	NFD	VDDNIT	C	M	N	K	H	A	Q	R	A	I	C	N	I	S	S	A	K	A	A	E	N	F	S	N	F	D	V	D	D	N	I	T
KH- A 86	Khartoum	Pf	1	1	AGTCAXTGCAGATCCGTATCATTGATGCCTAGTCACATCGATCTCATGAAAAAACAXAGACTGGCAACATCCCCAGAGCCATXAATATCCTCGCTACAAAC	WT	-	CVIET	ICNI	SGEAA	E	YFD	VDDSIT	C	I	E	T	H	S	E	I	A	I	C	N	I	S	S	G	E	A	A	E	Y	F	S	N	F	D	V	D	D	S	I	T
KH- A 87	Khartoum	Pf	1	1	AGTTAAXGTAANCGTGCGTAATGGATNCCTAATTACATCGAAXNTAAGAAAAGGTAXANACTGGCACCANACCTAGGCTTAGCACTGATCTTGTTACAGGT	WT	-	CVMNK	ICNI	SGEAA	E	YFD	VDDNIT	C	M	N	K	H	A	Q	R	A	I	C	N	I	S	S	G	E	A	A	E	Y	F	S	N	F	D	V	D	D	N	I	T
KH- A 88	Khartoum	Pf	1	1	AATCGXTGTAGATCTGTATCTTTAATGGCCAGTCATGATGATTTTAAGCAGGGATAXAGACAGGCGCTGTACCTAGGCTCATAAACGACCCTGCTATAAGT	WT	-	CVMNK	ICNI	SAKAA	E	NFD	VDDNIT	C	M	N	K	H	A	Q	R	A	I	C	N	I	S	S	A	K	A	A	E	N	F	S	N	F	D	V	D	D	N	I	T
KH- A 90	Khartoum	Pf	1	1	AATCGATGTAGATCTGTATCTTTAATGGCCAGTCATGATGATTTTAAGCAGGGATAXAGACAGGCGCTGTACCTAGGCTCATAAACGACCCTGCTATAAGT	WT	WT	CVMNK	ICNI	S[G/A]KAA	E	NFD	VDDNIT	C	M	N	K	H	A	Q	R	A	I	C	N	I	S	S	[G/A]	K	A	A	E	N	F	S	N	F	D	V	D	D	N	I	T
KH- A 91	Khartoum	Pf	1	1	AGTTAGTGCAAATGTCTAACNGGGATGCCTTGCCTCATTGCTCTCATGAAAAGGCAXACACTGGCGCCGTACCTCGGGTCATAGCTATCCTCGCTTCAAGT	WT	-	CVIET	ICNI	SGEGA	E	YYD	VDDSIT	C	I	E	T	H	S	E	I	A	I	C	N	I	S	S	G	E	G	A	E	Y	Y	S	N	F	D	V	D	D	S	I	T
KH- A 94	Khartoum	Pf	-	-	XGTXAXTGXXXAXGNXCAAXXGXXXTXXCXXXCXXCXTXXCXXXCAXXAAANXAXXXGXAXAAXCXCNXXACXTXXXXTXATXAXXAXXCXCXCTXXXXXX	-	-	CVIET	ICNI	SGEAA	-	Y--	VD-S--	C	I	E	T	-	S	-	I	A	I	C	N	I	S	S	G	E	A	A	-	Y	-	-	-	-	-	V	D	-	S	-	-
KH- A 95	Khartoum	Pf	2	2	ANTNAGNGNAGATGCGTNTCANGAGNNGCTAACCANANNNCNTTTANGNAANGGNAXNGACTGGNAATANANCNAGGGTCATNNNCGTCCTNGNTANNANN	WT	-	CVMNK	ICNI	S[G/A][K/E][A/G]A	E	NFD	VDDNIT	C	M	N	K	H	A	Q	R	A	I	C	N	I	S	S	[G/A]	[K/E]	[A/G]	A	E	N	F	S	N	F	D	V	D	D	N	I	T
KH- A 96	Khartoum	Pf	1	1	AGTTAACGCAAACGTCTAACATTGATACCCAGCTACATTGCTCTCAAAAAGAAGTAXGGACTAGCGCTGTACGTAGACCCATAGATATCCXCGCTACAGGC	WT	-	CVIET	ICNI	SGEAA	E	NFD	VDDSIT	C	I	E	T	H	S	E	I	A	I	C	N	I	S	S	G	E	A	A	E	N	F	S	N	F	D	V	D	D	S	I	T
KH- A 98	Khartoum	Pf	1	1	AGTCAGTGCGAATGTCTAACAGGGATACCTAGCCACGTTGCACTCATGAAAAGATAXACACTGGCACCGAACCCCGACCCATAAATGACCTCGTTACAAAT	WT	WT	CVIET	ICNI	SGEGA	E	YFD	VDDSIT	C	I	E	T	H	S	E	I	A	I	C	N	I	S	S	G	E	G	A	E	Y	F	S	N	F	D	V	D	D	S	I	T
KH- A 99	Khartoum	Pf	2	1	AGTTNATGCAAATCNCTATCANGAATGCCTNGTNACGTNGATCACATAAAAANACAXAGACTGGCNATATACNCAGAGCCATAANNNNCCTCGCTACAGNN	WT	-	CVIET	ICNI	SGE[A/G]A	E	YFD	VDDSIT	C	I	E	T	H	S	E	I	A	I	C	N	I	S	S	G	E	[A/G]	A	E	Y	F	S	N	F	D	V	D	D	S	I	T
KH- A 102	Khartoum	Pf	1	1	GATTAGCGCAGACGCGTATAAGGAATGGTTTGCTACGACGATCTTATGCAAAAGTGXGGACTAGTAACGTACCCAGACTCATAGATATTCCCGCTACAAAC	WT	WT	CVIET	ICNI	SGEAA	E	NFD	VDDSIT	C	I	E	T	H	S	E	I	A	I	C	N	I	S	S	G	E	A	A	E	N	F	S	N	F	D	V	D	D	S	I	T
KH- A 103	Khartoum	Pf	1	1	AGTCAGTGTAGACGTCCAACAGGAGTACCCAGCCACATTGCTCTCAAAAAAAGACAXGGACTGGTACCATAACCAGGGCTATAACCGTCACCGCTTCAAGT	WT	WT	CVMNK	IRNI	SGKAA	E	NYD	VDDNIT	C	M	N	K	H	A	Q	R	A	I	R	N	I	S	S	G	K	A	A	E	N	Y	S	N	F	D	V	D	D	N	I	T
KH- A 104	Khartoum	Pf	1	1	AGTCAGTGTAGACGTCCAACXGGAGTACCCAGCCACATTGCTCTCAAAAAAAGACAXGGACTGGTACCATAACCAGGGCTATAACCGTCACCGCTTCAAGT	WT	-	CVMNK	IRNI	SGKAA	E	NYD	VDDNIT	C	M	N	K	H	A	Q	R	A	I	R	N	I	S	S	G	K	A	A	E	N	Y	S	N	F	D	V	D	D	N	I	T
KH- A 105	Khartoum	Pf	1	1	AGTCGGCGTAGACGTCTATATGGAATGGCTAGCTATAATCCTTACAAAAAAAGATGXAGACTAGNACTAAACGCAGACTCATNGXCATCCTCGCTACAAGT	WT	-	CVMNK	ICNI	S[G/A][K/E]AA	E	YFD	VDDNIT	C	M	N	K	H	A	Q	R	A	I	C	N	I	S	S	[G/A]	[K/E]	A	A	E	Y	F	S	N	F	D	V	D	D	N	I	T
KH- A 106	Khartoum	Pf	-	-	AXXCAXTXTXGXCXXCXXXCAXTGAXGXXTTGXCTXAXCXXTTTXXXGXAXXGXCGXXGXCXXAXAXXGAXXGXAGXGXTXXAXCCXACXXXAXXTCAAXX	-	-	-----	--NI	---AA	E	-FD	--D-IT	-	-	-	-	H	-	E	-	-	-	-	N	I	-	-	-	-	A	A	E	-	F	S	N	F	D	-	-	D	-	I	T
KH- A 107	Khartoum	Pf	1	1	AXTTAGTXTXGXCXXCXXXCAXTGAXGXXTTGCTAXAXCXXTTTXXXAXAXXGNCAXXGACXAGXAXTGTXXGXAGXGXCXXXXCCNTCXXXNXXACAANX	-	-	-----	--NI	---AA	E	-YD	VDD-IT	-	-	-	-	H	-	E	[R/I]	-	-	-	N	I	-	-	-	-	A	A	E	-	Y	S	N	F	D	V	D	D	-	I	T
KH- A 108	Khartoum	Pf	2	2	NNTNAGNGNAGATCTGNATNAGGNNTAGTTAGNNATGNCXATTTTANNNGNAGNTGXAGACNNGCNACGTNCCCAGGCTCATXANTNTNCCCGCTACANNT	WT	-	CV[M/I][N/E][K/T]	I[C/R]NI	SGEAA	E	NFD	VDDNIT	C	[M/I]	[N/E]	[K/T]	H	[A/S]	[Q/E]	[R/I]	A	I	[C/R]	N	I	S	S	G	E	A	A	E	N	F	S	N	F	D	V	D	D	N	I	T
KH- A 109	Khartoum	Pf	1	1	AGTCAXTGCGAATGTCTAACXGGGXTACCTAGCCAXGTTXCACTCAXGXAAAGATAXACACTGXCACCGAACCCCGACCCAXXAATGACCXCGTTACAAAX	WT	-	CVIET	ICNI	SGEAA	E	YFD	VDDSIT	C	I	E	T	H	S	E	I	A	I	C	N	I	S	S	G	E	A	A	E	Y	F	S	N	F	D	V	D	D	S	I	T
KH- A 110	Khartoum	Pf	2	2	AGTNAGTGTAAATGTGTAACNNTAATACCTTGTTANNTCGCTTTCATANAANGNTAXGGACTGGCGCTXTANGCAGAGNTATANNCNNCCTCNCTNCAGNT	WT	WT	CV[M/I][N/E][K/T]	IRNI	SGEGA	E	YFD	VDD[N/S]IT	C	[M/I]	[N/E]	[K/T]	H	[A/S]	[Q/E]	[R/I]	A	I	R	N	I	S	S	G	E	G	A	E	Y	F	S	N	F	D	V	D	D	[N/S]	I	T
KH- A 111	Khartoum	Pf	1	1	AGTCAXTGCXXXTGTNTAACXGGXATGXCTTGCCACXTTGCACTCAXAXAAAGATAXXNACANXCGCXGAACCXCGXCCXATXAATGACCXCGTTXCAANX	-	-	CVIET	ICNI	-----	E	YFD	VDD-I-	C	I	E	T	H	S	E	I	A	I	C	N	I	S	-	-	-	-	-	E	Y	F	S	N	F	D	V	D	D	-	I	-
KH- A 114	Khartoum	Pf	1	1	AGTCAXTGTXGATGCGCAACTGGGATGXCTTGCCACAXCXCTTTCAXAXAAAAATAXGGACAXGCGXCGTACCTAGAGTCXXAACTATCCXCGCTACGAGX	-	-	CVIET	ICNI	SGEAA	E	YFD	VDDSIT	C	I	E	T	H	S	E	I	A	I	C	N	I	S	S	G	E	A	A	E	Y	F	S	N	F	D	V	D	D	S	I	T
KH- A 116	Khartoum	Pf	1	1	AGTCAGCGTAGACGTCTAACXGGAATACTCTGTCATGTCGCTTTTATAAAAAGATAXGGACTGGCACCATAAGTAGGGCTATAACCGTTCCCGCTTCGAGC	WT	WT	CVIET	IRNI	SGEGA	E	YFD	VDDSIT	C	I	E	T	H	S	E	I	A	I	R	N	I	S	S	G	E	G	A	E	Y	F	S	N	F	D	V	D	D	S	I	T
KH- A 117	Khartoum	Pf	-	-	XGTXAXCGXAXAXGCXCATXXGXXXCGCCXXXCXXCXTXGCXXXCAXXXXAAXAXXXGXAXTAXTXCCXXACXXXXAXCXATXGXXGXXCXCXCTXXXXGX	-	-	CVIET	IC--	SAKAA	-	Y--	VD-SI-	C	I	E	T	-	S	E	I	A	I	C	N	I	S	S	A	K	A	A	-	Y	-	-	-	-	-	V	D	-	S	I	-
KH- A 118	Khartoum	Pf	1	1	AGXTAXTGCAAACCTCCAACAGTGATGXCTTGCTTCGTTXAACTTGTAAAAAGACGXXGACTGGCACNGTCCCCAGGGXCXTXAACAAXCXCGCTATAGGT	WT	-	CVIET	ICNI	SAKAA	E	YFD	VDDNI-	C	I	E	T	H	S	E	I	A	I	C	N	I	S	S	A	-	-	-	E	Y	F	S	N	F	D	V	D	D	N	I	-
KH- A 121	Khartoum	Pf	1	1	AGTCAGTGCGAACGTGCGACAGTGATACCCAGCCACGTTGCTTTCAAGCAAAGATAXAGACTGGTACTGTACCCAGACTCAGAAACGACCTCGTTACAAAT	WT	WT	CVIET	ICNI	SGEGA	E	YFD	VDDSIT	C	I	E	T	H	S	E	I	A	I	C	N	I	S	S	G	E	G	A	E	Y	F	S	N	F	D	V	D	D	S	I	T
KH- A 122	Khartoum	Pf	-	-	XXTCGXTGXXXXTGXXTXAXXGGAXXAXXTXXTTAXXATXAXCXCXXAXXAXGAXAXXXAXXXXXAXTAXAXXXAXXXXXXXXXANXTXXXCXCTACGGXX	-	-	-----	--NI	-----	E	---	VDD-I-	-	-	-	-	-	S	-	[R/I]	-	-	-	N	I	-	-	-	-	-	-	E	-	-	-	-	-	-	V	D	D	-	I	-
KH- A 123	Khartoum	Pf	1	1	AGTCAXCGTAGATGCGCAACTGTGATGCCTTGCTACGTCGCTTTCAAAAAAAAACAXXGACAAGTGCCGTACCCAGAGTXATCGCTATCCXCGCTACAAGC	WT	-	CVIET	ICNI	SGEAA	E	YFD	VDDSIT	C	I	E	T	H	S	E	I	A	I	C	N	I	S	S	G	E	A	A	E	Y	F	S	N	F	D	V	D	D	S	I	T
KH- A 125	Khartoum	Pf	1	1	AGTCAGTGTAAATGTGTAACAGTAATACCTTGTTATGTCGCTTTCATAAAAGGATAXGGACTGGCGCTATAAGCAGAGTTATAAACGACCTCGCTTCAGAT	WT	-	CVMNK	IRNI	SGEGA	E	YFD	VDDNIT	C	M	N	K	H	A	Q	R	A	I	R	N	I	S	S	G	E	G	A	E	Y	F	S	N	F	D	V	D	D	N	I	T
KH- A 127	Khartoum	Pf	1	1	AATTAGTGCAGACGTGCAACAGTAATGCCCTGTTACATCGAATTCATGAAAAGGCAXAGACAGGCGCCATCAGCAGAGTCATAACTATTCCCACTTCAGGC	E433D	-	CVMNK	IRNI	SGEGA	E	NFD	VDDNIT	C	M	N	K	H	A	Q	R	A	I	R	N	I	S	S	G	E	G	A	E	N	F	S	N	F	D	V	D	D	N	I	T
KH- A 128	Khartoum	Pf	1	1	AGTCAXTGCGAGTGTGTAACXGGXATACCTAGTCTCGTTGCACNTATGAAAAGATAXGGACAGGTACCGXACCCAGGGTXATAAATGACCXCGCTACAAAT	-	-	CVIET	ICNI	SGEGA	E	YFD	VDD[S/I]IT	C	I	E	T	H	S	E	I	A	I	C	N	I	S	S	G	E	G	A	E	Y	F	S	N	F	D	V	D	D	[S/I]	I	T
KH- A 129	Khartoum	Pf	1	1	AGTCAXCGCAAACCTCTATCXGGAATACCTTGTCATGTCGCTCTCATAAAAAGATAXGGACTGGCXCCATAAGCAGAGCCATAACCGACCCCGCTTCGAGT	WT	-	CVIET	IRNI	SGEGA	E	YFD	VDDSIT	C	I	E	T	H	S	E	I	A	I	R	N	I	S	S	G	E	G	A	E	Y	F	S	N	F	D	V	D	D	S	I	T
KH- A 130	Khartoum	Pf	1	1	AGTCGGTGCAGATCTGTAACAGGGATACCTAGTCACATTGATCTTATGCAAAAATAXAGACTGGCACTAAACGTAGAGCTATAGATATCCTCGCTACAGGC	WT	-	CVIET	ICNI	SGEAA	E	YFD	VDDSIT	C	I	E	T	H	S	E	I	A	I	C	N	I	S	S	G	E	A	A	E	Y	F	S	N	F	D	V	D	D	S	I	T
KH- A 131	Khartoum	Pf	1	1	AGTCAXTGNXXACGTGTAAXXGTAXTACCCAGCTACATTXCXCXCAXGXAGAGGXXXXGCCTAGCACCGTACGTAXNNCXAXXGACGXCCXCXCTXCGGGX	-	-	CVIET	ICNI	SGKAA	E	YFD	VDDSIT	C	I	E	T	H	S	E	I	A	I	C	N	I	S	S	G	K	A	A	E	Y	F	S	N	F	D	V	D	D	S	I	T
KH- A 135	Khartoum	Pf	1	1	GATTAGCGCAGATCTGXATAAGGGATAXTTAGCCATGACGATXTTATGCGGAGGTGXAGACAGGCAACGTXCCCAGGCTCATXACTATTXXCGCTACAAAT	WT	-	CVMNK	ICNI	SGEAA	E	NFD	VDDNIT	C	M	N	K	H	A	Q	R	A	I	C	N	I	S	S	G	E	A	A	E	N	F	S	N	F	D	V	D	D	N	I	T
KH- A 136	Khartoum	Pf	1	1	AGTCAXTGCGAATGTCTAACAGGGATACCTAGCCACGTTGCACTCATGAAAAGATAXACACTGGCACCGAACCCCGACCCATAAATGACCTCGTTACAAAT	WT	-	CVIET	ICNI	SGEGA	E	YFD	VDDSIT	C	I	E	T	H	S	E	I	A	I	C	N	I	S	S	G	E	G	A	E	Y	F	S	N	F	D	V	D	D	S	I	T
KH- A 137	Khartoum	Pf	1	1	AATCGATGTAGATCTGTATCTTTAATGGCCAGTCATGATGATTTTAAGCAGGGATAXAGACAGGCGCTGTACCTAGGCTCATAAACGACCCTGCTATAAGT	WT	-	CVMNK	ICNI	SAKAA	E	NFD	VDDNIT	C	M	N	K	H	A	Q	R	A	I	C	N	I	S	S	A	K	A	A	E	N	F	S	N	F	D	V	D	D	N	I	T
KH- A 138	Khartoum	Pf	1	1	AGTCAXCGCAAACGTGCATCTGTGATACCTTGCTACATCXCTCTCAXAAAAAAGTAXXGACTAGCGCCGTACCCAGAGTCATAGCTATCCXCGCTACGAGC	-	-	CVIET	ICNI	SGEAA	E	NFD	VDDSIT	C	I	E	T	H	S	E	I	A	I	C	N	I	S	S	G	E	A	A	E	N	F	S	N	F	D	V	D	D	S	I	T
KH- A 139	Khartoum	Pf	1	1	AGTTAXTGTAAACGTCTATCNTTGXTACCTAXCTACATTGCTCTCATACAANXGTAXGGACTAXCGCTGTACGTAGACCCATXGCCATCCTCACTXCAGGC	-	-	CVIET	ICNI	SGEGA	E	YFD	VDDSIT	C	I	E	T	H	S	E	I	A	I	C	N	I	S	S	G	E	G	A	E	Y	F	S	N	F	D	V	D	D	S	I	T
KH- A 140	Khartoum	Pf	2	1	ANTCANNGTAGATGTGTANCAGGNGTGNCTTGCTTCGTTGATCACANNCAANGATAXNGACAGGCACNATACGCAGAGTCATNACCNTTCTCNTTTCAAAT	WT	WT	CVIET	ICNI	SGEGA	E	[N/Y]F[D/Y]	VDDNTT	C	I	E	T	H	S	E	I	A	I	C	N	I	S	S	G	E	G	A	E	[N/Y]	F	S	N	F	[D/Y]	V	D	D	N	T	T
KH- A 141	Khartoum	Pf	2	1	ANTCANNGTAGANGTCTANCAGGNGTGCCTTGNNTCGTNGATCACANNCAANGATAXNGACAGGCACTATACGCAGAGTCATNACCNTTCTCNTTTCAAAT	WT	-	CVIET	ICNI	SGEGA	E	YF[D/Y]	VDDNTT	C	I	E	T	H	S	E	I	A	I	C	N	I	S	S	G	E	G	A	E	Y	F	S	N	F	[D/Y]	V	D	D	N	T	T
KH- A 142	Khartoum	Pf	-	-	XXTTAXXXCXXXCGXGTAACAGGAXXGXXTTXXXAXXTXXCTCTXAXGXAAXGXXXXXXACXXXXGXNGXXCCTAXXGTXXXXXCXXXCCXCGXXXCGAXC	-	-	CVI--	--N-	-----	E	---	VDD-I-	C	I	-	-	H	-	E	I	-	-	-	N	-	-	-	-	-	-	-	E	-	-	-	-	-	-	V	D	D	-	I	-
KH- A 144	Khartoum	Pf	1	1	AGTCGGTGTAAATGTCTAACAGGGATACCTAGTTACGTTGATCTCATGCAAAGATAXGGACTGACGCTAAACGTAGAGCCATAGACGACCTCGCTACGGGC	WT	WT	CVIET	ICNI	SGEGA	E	YFD	VDDSIT	C	I	E	T	H	S	E	I	A	I	C	N	I	S	S	G	E	G	A	E	Y	F	S	N	F	D	V	D	D	S	I	T
KH- A 145	Khartoum	Pf	2	2	AGTCAXTXNXXACNXXXNAXAGNXXTAXCXTXCCNXXTNXNTNTNXXNXAAXXNTXXXGACXNXXNCNNXNCXXAXXNTTXNXXACATCXXCGCTNCANAX	-	-	CV---	ICNI	-----	E	-FD	VDDSIT	C	-	-	-	H	S	E	I	A	I	C	N	I	S	-	-	-	-	-	E	-	F	-	-	F	D	V	D	D	S	I	T
KH- A 146	Khartoum	Pf	1	1	AATCGXNGTAGACXTGCATXTTTAXCGCCNTXCCACGTTGNTNTTAAGNAGNGAXAXGGACTNXTNCTGTACXNAGGCTXATXAXCGTCCXTXCTXCANGT	-	-	CV[M/I][K/E]T	ICNI	S[G/A][K/E]--	E	[N/Y]FD	VDDSI-	C	[M/I]	[K/E]	T	H	S	E	I	A	I	C	N	I	S	S	[G/A]	[K/E]	A	A	E	[N/Y]	F	S	N	F	D	V	D	D	S	I	-
KH- A 147	Khartoum	Pf	1	1	AAXCGATGTAGATCTGTATCTTTAATGGCCAGTCATGATGATTTTAAGCAGGGATAXAGACAGGCGCTGTACCTAGGCTCATAAACGACCCTGCTATAAGT	WT	-	CVMNK	ICNI	SAKAA	E	NFD	VDDNIT	C	M	N	K	H	A	Q	R	A	I	C	N	I	S	S	A	K	A	A	E	N	F	S	N	F	D	V	D	D	N	I	T
KH-2017-114	Khartoum	Pf	1	1	NGTCAGCGCGGACGTGCAACXTGAATGCXTAGTCTCATCXCTCTCATACAAAGACGXAGACNAGTGCTATAACTAAGGTTCTXACCAACCTCGCTTCGAAT	WT	-	CVIET	ICNI	SAKAA	E	NFD	VDDNTT	C	I	E	T	H	S	E	I	A	I	C	N	I	S	S	A	K	A	A	E	N	F	S	N	F	D	V	D	D	N	T	T
KH- A 8	Khartoum	Pf	1	1	XGTTAXXGNXXXTGTXCAACATTAXTGXXXXXTTAXXNTXNXNTTAXGXAGANGXXXXXATAXXXACCAXAXCXAGXXCCXXXXANXXCAXTACTXCGAXX	-	-	CVMNK	IRNI	SGKAA	E	---	VDDNI-	C	M	N	K	H	A	Q	R	A	I	R	N	I	S	S	G	K	A	A	E	-	-	-	-	-	-	V	D	D	N	I	-
KH- A 10	Khartoum	Pf	1	1	XGTXAXXGXXXACGTGCAACTGGXXTGXCXXXTXXCXTXXCXCTTATGAAAXGAXXXAGACTXXXGACGACCXXAXXXCXATXAXXXXCCXTXCTXCGAXX	-	-	CVIET	ICNI	S[G/A]K-A	E	N--	VDDNI-	C	I	E	T	H	S	E	I	A	I	C	N	I	S	S	[G/A]	K	A	A	E	N	-	-	-	-	-	V	D	D	N	I	-
KH- A 13	Khartoum	Pf	1	1	XGTCAXTGTXAATGTGTAACXGGGXTGXCTTXCXATATTXATCTTATAAAAAGAXXXXGACTXGTGXCGXXCXXAGAXTXAXAAXCXXCXXCGCXXCGGXX	-	-	CVIET	ICNI	SGEAA	E	YF-	VDDSIT	C	I	E	T	H	S	E	I	A	I	C	N	I	-	S	G	E	A	A	E	Y	F	-	-	-	-	V	D	D	S	I	T
KH- A 19	Khartoum	Pf	1	1	XGTCAXXGXXXXCCTCTATXXGGAXXAXCXXXTXXTXTCXXXCXCAXAAAAAGAXXXGXAXTXXXGXCAXXXXXAXXXCXAXXACCXXCNCCXCTXXGAXX	-	-	CVIET	I[C/R]--	-----	E	Y--	VDDSI-	C	I	E	T	H	S	E	I	A	I	[C/R]	-	-	S	-	-	-	-	-	E	Y	-	-	-	-	-	V	D	D	S	I	-
KH- A 20	Khartoum	Pf	1	1	AGTCAATGTAGACGTCCAACXGGAATGXCCAGTCACGTTXCTTTTAAAAAAAGATAXAGACAAGCGCCGTACCCAGACTCATXAATGTCCXCGCTXCAAGX	-	-	CVIET	IRNI	SAKAA	E	YYY	VDDNIT	C	I	E	T	H	S	E	I	A	I	R	N	I	S	S	A	K	A	A	E	Y	Y	S	N	F	Y	V	D	D	N	I	T
KH- A 21	Khartoum	Pf	2	1	XGTTGXTGTXNNCGTGCGACAGGXATAXNNNXNNNNATCXCXTXTAXGXNAAGATXXANACAANXANTATCNCXNGXGTTATXAACXTCNXCGNTXCGNXX	-	-	CVMNK	[N/I][C/R]NI	S[G/A]KAA	E	-FD	VDDNIT	C	M	N	K	H	A	-	[R/I]	A	[N/I]	[C/R]	N	I	S	S	[G/A]	K	A	A	E	-	F	S	N	F	D	V	D	D	N	I	T
KH- A 24	Khartoum	Pf	1	1	XGTXGXTATXXATGTXCATXXGTAXTGXXXXXTXXTXTXXCXCXCAXAXNAXNXXXXXXAXTXXXXCCAXNCXXAGAGCXAXXGXCXXCCXCGCTXXGAXX	-	-	CVIET	IC--	-----	E	---	VDDSIT	C	I	E	T	H	S	E	I	A	I	C	-	-	-	-	-	-	-	-	E	-	-	-	-	-	-	V	D	D	S	I	T
KH- A 25	Khartoum	Pf	1	1	XGTTAGTGCXAACCTGCATCXTGGXTGXCTAXCCACATTXNTTTCATGAAAAGAXXXAGACTXAXGCCATACCXAGACTCAXAXCCGTCCXCGCXACAAGX	-	-	CVIET	IRNI	SGEGA	E	Y-D	VDDSIT	C	I	E	T	H	S	E	I	A	I	R	N	I	S	S	G	E	G	A	E	Y	-	-	-	F	D	V	D	D	S	I	T
KH- A 31	Khartoum	Pf	1	1	AGTCAXTGTGXXCCXCTXNXTXNXXTAXCNXXCCACXTXGCXCXCAAAXAAXGATXXXGCXTGXXAXCXXXCXTAGAGNTAXXAXCATCXXCXCTXCAAGT	WT K372K	-	-----	ICNI	-----	E	YFD	VDD-IT	-	-	-	-	H	S	E	I	A	I	C	-	-	S	-	-	-	-	-	E	Y	F	S	N	F	D	V	D	D	-	I	T
KH- A 34	Khartoum	Pf	1	1	GATCAXTGTAGGCGTGCGTCAGGGGCGGTTAXCTACAATXCTTACATGCAAGGACXXAGACTAGCACCATACCTAGGGTCATAAATGACACCGCTTCAAXX	WT	-	CVMNK	ICNI	SGEAA	E	YFD	VDDNIT	C	M	N	K	H	A	Q	R	A	I	C	N	I	-	S	G	E	A	A	E	Y	F	S	N	F	D	V	D	D	N	I	T
KH- A 37	Khartoum	Pf	1	1	XGTTGXTGTXXXTGTGTATXXTGGXTGXCTXXTXXCXTXXCXTXCAXGCAANGAXXXXGACTGXXGXCAXACXTAGAXCXATAGAXGXCCCCGCTXCAGXX	-	-	CVIET	-[C/R]--	SGEGA	E	YF-	VDDSI-	C	I	E	T	H	S	E	I	A	-	[C/R]	-	-	S	S	G	E	G	A	E	Y	F	-	-	-	-	V	D	D	S	I	-
KH- A 40	Khartoum	Pf	1	1	XGTXAXTGXAGACGTXTAAXXGGGACACXXTGTTXCXTTXAXCXCXTAXAAXGXXAXXXAXTXXXGXCGAXCXXAXAXCCAXAXCCXXNXXCGXXACAAXT	-	-	CVIET	----	-----	E	Y--	VDDNIT	C	I	E	T	H	S	E	I	-	-	-	-	-	-	-	-	-	-	-	E	Y	-	-	-	-	-	V	D	D	N	I	T
KH- A 42	Khartoum	Pf	1	1	XNTCAXTGNAAANGCGTATCATTAATGCCTTANTTNGTCXCTCTTAXGAAAXAATXXXGACNNXCAXCNTCCXXAGXGTNANXACNXXCCXCGCTXCAAXX	-	-	CVIET	ICNI	SAKAA	E	NFD	VDDSIT	C	I	E	T	H	S	E	I	A	I	C	N	I	S	S	A	K	A	A	E	N	F	-	N	F	D	V	D	D	S	I	T
KH- A 46	Khartoum	Pf	1	1	AGTCNXXXCAXXXNXGNXNXTGGXXTNXCTNXTCATGTTGNTCNCATGAAAAGATXXXGACAAGCACCGTXCXCAGACTCXTXAXCGAXXXCGCTACAXNT	WT E606K	-	CVIET	IC--	-----	E	-FD	VD-S--	C	I	E	T	H	S	-	I	A	I	C	-	-	S	-	-	-	-	-	E	-	F	-	-	F	D	V	D	-	S	-	-
KH- A 48	Khartoum	Pf	1	1	AGTTNXTGCGGXTNXGXXNXAGTAXTNXTNNXTCTXGXCGNAXTTAAXAAAXNAXAXXXACAGGCXCTXXXCXTAGAGCTXTXAXTAAXCXCXCANCAXXT	-	-	CV[M/I][N/E][K/T]	ICNI	SGEAA	E	-FD	VD--IT	C	[M/I]	[N/E]	[K/T]	-	[A/S]	[Q/E]	R	A	I	C	N	I	S	S	G	E	A	A	E	-	F	S	N	F	D	V	D	-	-	I	T
KH- A 63	Khartoum	Pf	1	1	AXTCAXTGTXXACCTGTGACAGTGATACCCTXCCACNTTXCTCTTXXGXAAAGATAXXXXXTXGXACTGXACXXAGGCTXXGXAACXXCCCCXCTACAAAX	-	-	CVIET	ICNI	-----	E	-FD	VDDSIT	C	I	E	T	H	S	E	I	A	I	C	N	I	S	-	-	-	-	-	E	-	F	-	-	F	D	V	D	D	S	I	T
KH- A 66	Khartoum	Pf	1	1	XGTTAXTGNXXATGTXTATCTGTAAXGGCXTXCXXXXATXAXCXTAAXXGGAGAXXXAXXXTXXCAATGXNCXXAXGXTXATXAAXAXCCTTXXTXXAGAX	-	-	CV[M/I][N/E][K/T]	IC--	-----	E	YF-	VDDNIT	C	[M/I]	[N/E]	[K/T]	-	S	E	I	A	I	C	-	-	S	-	-	-	-	-	E	Y	F	-	-	-	-	V	D	D	N	I	T
KH- A 74	Khartoum	-	1	1	AGXCNXTXTXAXCNXGXXNCXXTGATAXXTTXXCAXAXCXXTTTXXXAXAXXGXTAXXGACXXGXGXCATXXCXAGXGTCXXAXCTATCXXCGXTACGGXX	-	-	CV[M/I][N/E][K/T]	--NI	-----	E	-FD	VDD-I-	C	[M/I]	[N/E]	[K/T]	H	[A/S]	-	[R/I]	-	-	-	N	I	-	-	-	-	-	-	E	-	F	S	N	F	D	V	D	D	-	I	-
KH- A 79	Khartoum	Pf	1	1	XGTCAXTGXAXXTGCXTANXTGTXXTNXCTXXCXXCXXTCCXXXTAANXAAAXAXXXXGAXTAXCXCTXXACXCAXGCCXXGXAXXGXXCTNXCTXCAXGT	-	-	CVIET	IC--	SAK--	-	Y--	VD-NI-	C	I	E	T	-	S	-	I	A	I	C	-	-	S	S	A	K	-	-	-	Y	-	-	-	-	-	V	D	-	N	I	-
KH- A 80	Khartoum	-	1	1	XGTCAXTGXXXATGTCTGAXXGXGXTNXTTXXCXACXTXXCXCTCATAXGAAGAXXXAXAXTXXCACCGXAAXXCXXXCXAXXAXXGXXCXCXCTXCAXXT	-	-	CVIET	IC--	SA---	E	---	VDDSIT	C	I	E	T	H	S	E	I	A	I	C	-	-	S	S	A	-	-	-	E	-	-	-	-	-	-	V	D	D	S	I	T
