# Supplementary material for: Antimalarial drug resistance molecular makers of Plasmodium falciparum isolates from Sudan during 2015–2017
Source: PLoS One. 2020 Aug 20;15(8):e0235401. doi: 10.1371/journal.pone.0235401 (PMC7446868; doi:10.1371/journal.pone.0235401)
Supplement: S2 File — (XLSX) [file pone.0235401.s002.xlsx]

## Sheet: ENA accession numbers
Sample Internal ID	Sample External ID	Accession number
SPT38302	AA0015287	ERS2803116
SPT38303	AA0015288	ERS2803117
SPT38304	AA0015289	ERS2803113
SPT38305	AA0015290	ERS2803115
SPT38306	AA0015291	ERS2803112
SPT38307	AA0015292	ERS2803114
SPT38308	AA0015293	ERS2803134
SPT38309	AA0015294	ERS2803135
SPT38310	AA0015295	ERS2803132
SPT38311	AA0015296	ERS2803130
SPT38312	AA0015297	ERS2803128
SPT38313	AA0015298	ERS2803133
SPT38314	AA0015299	ERS2803131
SPT38315	AA0015300	ERS2803129
SPT38316	AA0015301	ERS2803053
SPT38317	AA0015302	ERS2803052
SPT38318	AA0015303	ERS2803107
SPT38319	AA0015304	ERS2803104
SPT38320	AA0015305	ERS2803106
SPT38321	AA0015306	ERS2803109
SPT38323	AA0015308	ERS2803111
SPT38324	AA0015309	ERS2803110
SPT38325	AA0015310	ERS2803071
SPT38326	AA0015311	ERS2803070
SPT38328	AA0015313	ERS2803068
SPT38329	AA0015314	ERS2803067
SPT38330	AA0015315	ERS2803066
SPT38331	AA0015316	ERS2803065
SPT38332	AA0015317	ERS2803142
SPT38333	AA0015318	ERS2803143
SPT38334	AA0015319	ERS2803140
SPT38335	AA0015320	ERS2803141
SPT38336	AA0015321	ERS2803138
SPT38337	AA0015322	ERS2803139
SPT38338	AA0015323	ERS2803136
SPT38339	AA0015324	ERS2803137
SPT38340	AA0015325	ERS2803054
SPT38341	AA0015326	ERS2803055
SPT38342	AA0015327	ERS2803080
SPT38343	AA0015328	ERS2803081
SPT38344	AA0015329	ERS2803082
SPT38345	AA0015330	ERS2803083
SPT38346	AA0015331	ERS2803087
SPT38347	AA0015332	ERS2803084
SPT38348	AA0015333	ERS2803085
SPT38349	AA0015334	ERS2803086
SPT38350	AA0015335	ERS2803064
SPT38351	AA0015336	ERS2803079
SPT38352	AA0015337	ERS2803063
SPT38353	AA0015338	ERS2803062
SPT38354	AA0015339	ERS2803061
SPT38355	AA0015340	ERS2803060
SPT38356	AA0015341	ERS2803059
SPT38357	AA0015342	ERS2803058
SPT38358	AA0015343	ERS2803057
SPT38359	AA0015344	ERS2803056
SPT38360	AA0015345	ERS2803073
SPT38361	AA0015346	ERS2803072
SPT38362	AA0015347	ERS2803074
SPT38363	AA0015348	ERS2803075
SPT38364	AA0015349	ERS2803076
SPT38365	AA0015350	ERS2803077
SPT38366	AA0015351	ERS2803078
SPT38367	AA0015352	ERS2803124
SPT38368	AA0015353	ERS2803125
SPT38369	AA0015354	ERS2803122
SPT38370	AA0015355	ERS2803123
SPT38371	AA0015356	ERS2803120
SPT38372	AA0015357	ERS2803121
SPT38373	AA0015358	ERS2803103
SPT38374	AA0015359	ERS2803101
SPT38375	AA0015360	ERS2803100
SPT38376	AA0015361	ERS2803102
SPT38377	AA0015362	ERS2803099
SPT38378	AA0015363	ERS2803098
SPT38379	AA0015364	ERS2803096
SPT38380	AA0015365	ERS2803097
SPT38381	AA0015366	ERS2803095
SPT38382	AA0015367	ERS2803094
SPT38383	AA0015368	ERS2803093
SPT38384	AA0015369	ERS2803092
SPT38385	AA0015370	ERS2803091
SPT38386	AA0015371	ERS2803090
SPT38387	AA0015372	ERS2803089
SPT38388	AA0015373	ERS2803088
SPT38389	AA0015374	ERS2803126
SPT38390	AA0015375	ERS2803105
SPT38391	AA0015376	ERS2803127
SPT38392	AA0015377	ERS2803118
SPT38393	AA0015378	ERS2803051
SPT38394	AA0015379	ERS2803050
SPT38489	AA0015474	ERS2853004
SPT38490	AA0015475	ERS2853005
SPT38491	AA0015476	ERS2852976
SPT38492	AA0015477	ERS2852952
SPT38493	AA0015478	ERS2852951
SPT38494	AA0015479	ERS2852954
SPT38495	AA0015480	ERS2852953
SPT38496	AA0015481	ERS2852955
SPT38498	AA0015483	ERS2852956
SPT38499	AA0015484	ERS2852957
SPT38501	AA0015486	ERS2852936
SPT38502	AA0015487	ERS2852938
SPT38503	AA0015488	ERS2852937
SPT38504	AA0015489	ERS2852939
SPT38505	AA0015490	ERS2852940
SPT38506	AA0015491	ERS2852942
SPT38507	AA0015492	ERS2852941
SPT38508	AA0015493	ERS2852930
SPT38509	AA0015494	ERS2852997
SPT38510	AA0015495	ERS2852996
SPT38512	AA0015497	ERS2852999
SPT38513	AA0015498	ERS2853001
SPT38514	AA0015499	ERS2853000
SPT38515	AA0015500	ERS2853003
SPT38517	AA0015502	ERS2852981
SPT38518	AA0015503	ERS2852982
SPT38519	AA0015504	ERS2852979
SPT38520	AA0015505	ERS2852980
SPT38521	AA0015506	ERS2852977
SPT38522	AA0015507	ERS2852978
SPT38523	AA0015508	ERS2852975
SPT38524	AA0015509	ERS2852934
SPT38525	AA0015510	ERS2855600
SPT38528	AA0015513	ERS2852946
SPT38529	AA0015514	ERS2852945
SPT38530	AA0015515	ERS2855599
SPT38531	AA0015516	ERS2852943
SPT38532	AA0015517	ERS2852944
SPT38533	AA0015518	ERS2855571
SPT38534	AA0015519	ERS2855557
SPT38535	AA0015520	ERS2852947
SPT38537	AA0015522	ERS2852950
SPT38538	AA0015523	ERS2852949
SPT38539	AA0015524	ERS2852992
SPT38540	AA0015525	ERS2852993
SPT38395	AA0015380	ERS2922773
SPT38445	AA0015430	ERS2922823
SPT38446	AA0015431	ERS2922824
SPT38447	AA0015432	ERS2922825
SPT38450	AA0015435	ERS2922828
SPT38451	AA0015436	ERS2922829
SPT38452	AA0015437	ERS2922830
SPT38454	AA0015439	ERS2922832
SPT38455	AA0015440	ERS2922833
SPT38457	AA0015442	ERS2922835
SPT38460	AA0015445	ERS2922838
SPT38462	AA0015447	ERS2922840
SPT38465	AA0015450	ERS2922843
SPT38467	AA0015452	ERS2922845
SPT38468	AA0015453	ERS2922846
SPT38469	AA0015454	ERS2922847
SPT38475	AA0015460	ERS2922853
SPT38477	AA0015462	ERS2922855
SPT38483	AA0015468	ERS2922861
SPT38486	AA0015471	ERS2922864
SPT38487	AA0015472	ERS2922865
SPT38687	AA0015672	ERS2855598
SPT38688	AA0015673	ERS2855569
SPT38690	AA0015675	ERS2855567
SPT38691	AA0015676	ERS2855568
SPT38692	AA0015677	ERS2855583
SPT38694	AA0015679	ERS2855581
SPT38695	AA0015680	ERS2855578
SPT38696	AA0015681	ERS2855579
SPT38697	AA0015682	ERS2855576
SPT38698	AA0015683	ERS2855577
SPT38699	AA0015684	ERS2855533
SPT38703	AA0015688	ERS2855529
SPT38704	AA0015689	ERS2855530
SPT38705	AA0015690	ERS2855527
SPT38706	AA0015691	ERS2855528
SPT38708	AA0015693	ERS2855543
SPT38709	AA0015694	ERS2855544
SPT38710	AA0015695	ERS2855546
SPT38711	AA0015696	ERS2855545
SPT38713	AA0015698	ERS2855548
SPT38714	AA0015699	ERS2855549
SPT38715	AA0015700	ERS2855550
SPT38716	AA0015701	ERS2855601
SPT38718	AA0015703	ERS2855604
SPT38719	AA0015704	ERS2855603
SPT38720	AA0015705	ERS2855573
SPT38721	AA0015706	ERS2855572
SPT38730	AA0015715	ERS2855541
SPT38731	AA0015716	ERS2855542
SPT38735	AA0015720	ERS2855552
SPT38736	AA0015721	ERS2855593
SPT38737	AA0015722	ERS2855592
SPT38738	AA0015723	ERS2855595
SPT38739	AA0015724	ERS2855594
SPT38740	AA0015725	ERS2855597
SPT38741	AA0015726	ERS2855596
SPT38742	AA0015727	ERS2855606
SPT38743	AA0015728	ERS2855605
SPT38744	AA0015729	ERS2855551
SPT38745	AA0015730	ERS2855553
SPT38747	AA0015732	ERS2855555
SPT38748	AA0015733	ERS2855556
SPT38749	AA0015734	ERS2855558
SPT38750	AA0015735	ERS2855559
SPT38751	AA0015736	ERS2855560
SPT38752	AA0015737	ERS2855561
SPT38753	AA0015738	ERS2855562
SPT38754	AA0015739	ERS2855563
SPT38755	AA0015740	ERS2855564
SPT38756	AA0015741	ERS2855565
SPT38757	AA0015742	ERS2855566
SPT38758	AA0015743	ERS2855608
SPT38401	AA0015386	ERS2922779
SPT38412	AA0015397	ERS2922790
SPT38413	AA0015398	ERS2922791
SPT38416	AA0015401	ERS2922794
SPT38418	AA0015403	ERS2922796
SPT38421	AA0015406	ERS2922799
SPT38422	AA0015407	ERS2922800
SPT38424	AA0015409	ERS2922802
SPT38425	AA0015410	ERS2922803
SPT38426	AA0015411	ERS2922804
SPT38427	AA0015412	ERS2922805
SPT38428	AA0015413	ERS2922806
SPT38429	AA0015414	ERS2922807
SPT38430	AA0015415	ERS2922808
SPT38433	AA0015418	ERS2922811
